# Supplementary material for: Increase in the oxidised low-density lipoprotein level by smoking and the possible inhibitory effect of statin therapy in patients with cardiovascular disease: a retrospective study
Source: PubMed Central journal article supplement — BMJ Open. 2015 Jan 21;5(1):e005455. doi: 10.1136/bmjopen-2014-005455 (PMC4305066; doi:10.1136/bmjopen-2014-005455), 2015-01-21
Supplement: bmjopen-2014-005455.draft_revisions.pdf [file bmjopen-2014-005455.draft_revisions.pdf]

# BMJ Open

## Increase in the Oxidized Low-Density Lipoprotein Level by Smoking and the Possible Inhibitory Effect of Statin Therapy in Patients with Cardiovascular Disease.

|                                 |                                                                                                                                                                                                                                                                                                                                                                                                                                                                                                                                                                                                                                                                                                                                                                                                                                                                                                                                                                           |
|---------------------------------|---------------------------------------------------------------------------------------------------------------------------------------------------------------------------------------------------------------------------------------------------------------------------------------------------------------------------------------------------------------------------------------------------------------------------------------------------------------------------------------------------------------------------------------------------------------------------------------------------------------------------------------------------------------------------------------------------------------------------------------------------------------------------------------------------------------------------------------------------------------------------------------------------------------------------------------------------------------------------|
| Journal:                        | <i>BMJ Open</i>                                                                                                                                                                                                                                                                                                                                                                                                                                                                                                                                                                                                                                                                                                                                                                                                                                                                                                                                                           |
| Manuscript ID:                  | bmjopen-2014-005455                                                                                                                                                                                                                                                                                                                                                                                                                                                                                                                                                                                                                                                                                                                                                                                                                                                                                                                                                       |
| Article Type:                   | Research                                                                                                                                                                                                                                                                                                                                                                                                                                                                                                                                                                                                                                                                                                                                                                                                                                                                                                                                                                  |
| Date Submitted by the Author:   | 12-Apr-2014                                                                                                                                                                                                                                                                                                                                                                                                                                                                                                                                                                                                                                                                                                                                                                                                                                                                                                                                                               |
| Complete List of Authors:       | Ogawa, Kazuo; The Jikei University School of Medicine, Division of Cardiology, Department of Internal Medicine<br>Tanaka, Toshikazu; The Jikei University School of Medicine, Division of Cardiology, Department of Internal Medicine<br>Nagoshi, Tomohisa; The Jikei University School of Medicine, Division of Cardiology, Department of Internal Medicine<br>Sekiyama, Hiroshi; The Jikei University School of Medicine, Division of Cardiology, Department of Internal Medicine<br>Arase, Satoshi; The Jikei University School of Medicine, Division of Cardiology, Department of Internal Medicine<br>Minai, Kosuke; The Jikei University School of Medicine, Division of Cardiology, Department of Internal Medicine<br>Ogawa, Takayuki; The Jikei University School of Medicine, Division of Cardiology, Department of Internal Medicine<br>Yoshimura, Michihiro; The Jikei University School of Medicine, Division of Cardiology, Department of Internal Medicine |
| <b>Primary Subject Heading</b>: | Cardiovascular medicine                                                                                                                                                                                                                                                                                                                                                                                                                                                                                                                                                                                                                                                                                                                                                                                                                                                                                                                                                   |
| Secondary Subject Heading:      | Smoking and tobacco, Epidemiology                                                                                                                                                                                                                                                                                                                                                                                                                                                                                                                                                                                                                                                                                                                                                                                                                                                                                                                                         |
| Keywords:                       | Coronary heart disease < CARDIOLOGY, Lipid disorders < DIABETES & ENDOCRINOLOGY, Cardiology < INTERNAL MEDICINE                                                                                                                                                                                                                                                                                                                                                                                                                                                                                                                                                                                                                                                                                                                                                                                                                                                           |
|                                 |                                                                                                                                                                                                                                                                                                                                                                                                                                                                                                                                                                                                                                                                                                                                                                                                                                                                                                                                                                           |

SCHOLARONE™  
Manuscripts

1  
2  
3  
4  
5  
6 **Increase in the Oxidized Low-Density Lipoprotein Level by Smoking and the Possible**  
7  
8  
9 **Inhibitory Effect of Statin Therapy in Patients with Cardiovascular Disease.**  
10

11  
12  
13  
14  
15 Kazuo Ogawa, MD. ; Toshikazu Tanaka, MD. PhD. ; Tomohisa Nagoshi, MD. PhD.;

16  
17  
18 Hiroshi Sekiyama, MD. PhD. ; Satoshi Arase, MD. ; Kosuke Minai, MD. PhD. ;

19  
20  
21 Takayuki Ogawa, MD. PhD and Michihiro Yoshimura, MD. PhD.

22  
23  
24 Division of Cardiology, Department of Internal Medicine,

25  
26  
27 The Jikei University School of Medicine, Tokyo, Japan  
28  
29  
30  
31  
32

33 All correspondence should get to Kazuo Ogawa, MD

34 Division of Cardiology, Department of Internal Medicine

35 The Jikei University School of Medicine

36 3-25-8, Nishi-Shinbashi, Minato-ku

37 Tokyo, Japan 105-8461

38 Telephone: +81-3-3433-1111

39 FAX: +81-3-3433-3459

40 E-mail: [oga-n@jikei.ac.jp](mailto:oga-n@jikei.ac.jp)

41 This author takes responsibility for all aspects of the reliability and freedom from bias of the  
42 data presented and their discussed interpretation  
43  
44  
45  
46  
47  
48  
49

50 **Keywords:** MDA-LDL; Smoking; Oxidative stress; Coronary artery disease; Statin therapy  
51

52  
53 **Word count:** 2769  
54  
55  
56  
57  
58  
59  
60

**Abstract**

## Objectives:

MDA-LDL level is a marker of oxidative stress and is linked to progression of arteriosclerosis; however, the clinical factors affecting to the oxidized LDL level have not been elucidated. We herein investigated various factors to identify correlation with MDA-LDL level in high risk patients requiring catheter intervention.

## Setting:

Secondary care (cardiology), single center study

## Participants:

600 patients who were admitted to our hospital and underwent cardiac catheterization

## Primary and secondary outcome measures:

Blood samples were obtained to measure lipid profiles and MDA-LDL level.

## Results:

With regard to smoking status, MDA-LDL level was significantly higher in ex-/current smokers compared with non-smokers. Of note, there was no improvement of MDA-LDL level even in patients who quitted smoking. Multiple regression analysis showed that MDA-LDL level was positively correlated with LDL-cholesterol level, Brinkman index and male gender. The correlation between smoking status and either MDA-LDL or LDL-C level was investigated in

1  
2  
3  
4  
5  
6 two groups; namely, patients, with or without statin treatment. In non-statin group, MDA-LDL  
7  
8  
9 level and MDA-LDL/LDL-C ratio were significantly higher in ex-/current smokers compared  
10  
11  
12 with non-smoker, while no significant correlation was observed between smoking status and  
13  
14  
15 LDL-C level. In contrast, in statin group, there were no significant correlations between  
16  
17  
18 smoking status and all any of these cholesterol parameters.  
19

20  
21 Conclusions:

22  
23 We found that MDA-LDL level was affected by multiple factors, such as smoking status, LDL-  
24  
25  
26 C level and male gender. The present findings give additional evidence that smoking should be  
27  
28  
29 prohibited from MDA-LDL standpoint. Furthermore, statin therapy might have a beneficial  
30  
31  
32 effect on the reduction of MDA-LDL level.  
33

34  
35 Trial registration:

36  
37  
38 N/A  
39

#### 40 41 42 43 **Main strengths**

44  
45 Although oxidative LDL is associated with the marker of oxidative stress and the progression of  
46  
47  
48 atherosclerosis, clinical factor which affects the oxidative LDL remains uncertain. Our study  
49  
50  
51 revealed that MDA-LDL was associated with smoking and the MDA-LDL level would never  
52  
53  
54 decrease with smoking cessation. However, MDA-LDL level was decreasing even in smokers  
55  
56  
57 with statin therapy.  
58

### Study limitations

Smoking cessation was not found to be effective for reducing MDA-LDL level in this study; however, favorable effects of smoking cessation would likely occur with regard to other parameters than MDA-LDL level. Thus smoking cessation is recommended at any time, even after long-term smoking, and is considered to provide cardiovascular health benefits.

This was a retrospective study, and the true effects of a statin on MDA-LDL level remain unclear. Finally, we did not examine the prognosis of the study population and therefore, the effects of smoking cessation and/or statin therapy remains unclear especially in terms of their impact on MDA-LDL level. Prospective studies are required to obtain answers regarding these topics.

## Introduction

The malondialdehyde modified low-density lipoprotein (MDA-LDL; oxidized LDL) is LDL that has been modified by MDA, leading to the production of a large amount of aldehyde when LDL becomes degenerated and oxidized<sup>1</sup>.

It is known that MDA-LDL level is elevated in patients with dyslipidemia and diabetes mellitus (DM), both risks factors for atherosclerotic disease<sup>2,3</sup>. Since MDA-LDL level has a positive correlation with the serum LDL level, the ratio of MDA-LDL/LDL-C (M/L) is used to evaluate the severity of oxidization of LDL; in some reports, not only MDA-LDL level, but also M/L ratio has been shown to increase in patients with DM compared with controls<sup>4,5</sup>.

In patients with coronary artery disease (CAD), MDA-LDL level and M/L ratio have been shown to increase even when there are no other differences in the other lipid profiles<sup>6</sup>. In addition, it has been shown that the measurement of MDA-LDL level might be useful as a predictor of restenosis after percutaneous coronary intervention in patients with DM<sup>7</sup>. Based on these findings, it has been speculated that MDA-LDL level might be important marker of the progression of arteriosclerosis; however, the clinical factors possibly affecting MDA-LDL level have not been elucidated. Therefore, in the present study, we investigated “the clinical factors” affecting MDA-LDL level in high risk patients requiring catheter intervention.

## Methods

### *Study patients*

The study protocol (24-150[6916]) was approved by the ethics committee of the Jikei University School of Medicine. Six hundred consecutive patients who underwent cardiac catheterization from March 2010 to September 2011 were examined in this study. The baseline patient characteristics, including the clinical parameters and the biochemical data, were collected retrospectively from the hospital medical records. In addition, the results of the catheterization (i.e. the number of occluded or narrowed vessels), body weight, body mass index (BMI), coronary risk factors and medication profiles were also investigated. The patients taking eicosapentaenoic acid (EPA) were excluded since it has been demonstrated that EPA is major antihyperlipidemic agents with potent antioxidant effects.

### *Data collection*

Blood sampling was performed to examine the serum MDA-LDL, serum creatinine, hemoglobin A1c (HbA1c), B-type (brain) natriuretic peptide (BNP) and low-density lipoprotein cholesterol (LDL-C) levels. MDA-LDL level was measured by an ELISA using an anti-MDA-LDL monoclonal antibody (ML25) and  $\beta$ -galactosidase anti-apoB monoclonal antibody (AB16)

<sup>1</sup>. It is well known that the combination of ML25 and AB16 can accurately detect MDA-LDL <sup>1</sup>.

1  
2  
3  
4  
5  
6 The concentration of MDA-LDL is defined at 1 mg/L of MDA-LDL produced artificially, which  
7  
8  
9 shows the same signal as 1U/L of MDA-LDL in the serum. Diabetes mellitus (DM),  
10  
11  
12 hypertension, dyslipidemia and smoking were defined as described previously<sup>8,9</sup>. The definition  
13  
14  
15 of smoking status was as follows: current smokers were those who were smoking at the time of  
16  
17  
18 the study or who had smoked in the past year; the subjects who had quit smoking more than one  
19  
20  
21 year before the study were defined as ex-smokers and those who had never smoked were  
22  
23  
24 defined as non-smokers. Brinkman Index was used to evaluate the smoking status of current/ex-  
25  
26  
27 smokers<sup>10</sup>.  
28  
29  
30  
31

### 32 *Statistical analysis*

33  
34  
35 Comparisons between MDA-LDL level and LDL-C level, age, BMI, HbA1c, Cr, BNP and  
36  
37  
38 Brinkman index were performed with a linear regression analysis. Comparison between  
39  
40  
41 Brinkman index and LDL-C was also performed with a linear regression analysis. Comparisons  
42  
43  
44 of MDA-LDL levels between males and females, subjects with or without hypertension, non-  
45  
46  
47 smokers versus ex-smokers versus current smokers, and among the various patient groups after  
48  
49  
50 smoking cessation were performed with Mann-Whitney U test. Multiple factors, which were  
51  
52  
53 considered to possibly modify MDA-LDL level were evaluated with a stepwise multiple  
54  
55  
56 regression analysis. Comparisons of LDL-C and MDA-LDL level and M/L ratio between non-  
57  
58  
59  
60



1  
2  
3  
4  
5  
6 smokers and smokers were performed with Mann-Whitney U test.  
7  
8

9 Statistical significance was defined as a value of  $p < 0.05$ .  
10  
11  
12  
13  
14  
15  
16  
17  
18  
19  
20  
21  
22  
23  
24  
25  
26  
27  
28  
29  
30  
31  
32  
33  
34  
35  
36  
37  
38  
39  
40  
41  
42  
43  
44  
45  
46  
47  
48  
49  
50  
51  
52  
53  
54  
55  
56  
57  
58  
59  
60

For peer review only

## Results

### *Baseline characteristics*

The baseline characteristics of the patients in this study are shown in Table 1. The average age was  $64.8 \pm 11.4$  years old and 80.3% of them were male. The percentages of non-smokers, ex-smokers and current smokers were 32%, 42% and 26%, respectively. The average LDL-C level and MDA-LDL level was  $106.1 \pm 30.8$  mg/dl and  $119.2 \pm 48.7$  U/L, respectively. The percentage of patients taking statin therapy was 55.3%.

**Table 1-1 Patient's Characteristics**

| <b>n=600</b>                    | <b>mean + SD</b> |
|---------------------------------|------------------|
| Age, years                      | 64.8±11.4        |
| Male, gender (%)                | 80.3             |
| Height, cm                      | 165.4±25.1       |
| Weight, kg                      | 66.8±13.3        |
| BMI, kg/m <sup>2</sup>          | 24.4±3.74        |
| Non-smoker,n(%)                 | 192(32.4)        |
| Ex-smoker,n(%)                  | 247(41.7)        |
| Current smoker,n(%)             | 153(25.8)        |
| Cr, mg/dL                       | 1.38±1.94        |
| eGFR, mL/min/1.73m <sup>2</sup> | 62.6±21.6        |
| HbA1c, %                        | 6.4±1.1          |
| BNP, pg/mL                      | 140±263          |
| LDL-C,mg/dl                     | 106.1±30.8       |
| MDA-LDL,U/L                     | 119.2±48.7       |
| M/L                             | 1.16±0.47        |

BMI: body mass index Cr: creatinine, eGFR: estimated glomerular filtration rate, BNP: B-type natriuretic peptide, LDL-C:low-density lipoprotein cholesterol ,MDA-LDL: Malondialdehyde modified low density lipoprotein. M/L: Malondialdehyde modified low density lipoprotein/ low density lipoprotein cholesterol,

**Table 1-2 Patient's Characteristics**

| <b>Disease</b>    | <b>n(%)</b> |
|-------------------|-------------|
| Diabetes Mellitus | 252(42.0)   |
| Hypertension      | 455(75.5)   |

|                         |           |
|-------------------------|-----------|
| Dyslipidemia            | 441(73.5) |
| Medicine                | n(%)      |
| statin                  | 332(55.3) |
| Ezetimibe               | 31(5.2)   |
| fibrate                 | 13(2.1)   |
| Coronary Artery Disease | n(%)      |
| 0VD                     | 215(35.8) |
| 1VD                     | 249(41.5) |
| 2VD                     | 84(14.0)  |
| 3VD                     | 52(8.7)   |

0VD: 0-vessel disease, 1VD: single-vessel disease, 2VD: double-vessel disease, 3VD: triple-vessel disease

#### *Clinical factors affecting MDA-LDL level*

To elucidate the determinants of MDA-LDL level, we first performed a simple regression analysis (*Fig. 1*). MDA-LDL level showed a significantly positive correlation with LDL-C level (*Fig. 1A*) and a negative correlation with age (*Fig. 1B*). In addition, MDA-LDL levels were significantly higher in males as well as the patients without hypertension (*Figs. 1C, D*). BMI, HbA1c, Cr and BNP level had no impact on MDA-LDL level (*Figs. 1E-H*).

#### *Correlation of smoking status with MDA-LDL level*

We next examined the impact of smoking status on MDA-LDL level. MDA-LDL, but not LDL-C, showed a significantly positive correlation with the smoking profiles indicated by Brinkman

1  
2  
3  
4  
5  
6 index (*Fig. 2-A, B*). The patients were subsequently divided into three groups according to their  
7  
8  
9 smoking status: Non-, ex- and current smokers. MDA-LDL level was significantly higher in  
10  
11  
12 both ex- and current smokers compared to that in non-smokers (*Fig. 2-C*). Moreover, when  
13  
14  
15 patients were compared based on the number of years after smoking cessation, not only the  
16  
17  
18 current smoking group, but also the group that had quit smoking within 10 years and that where  
19  
20  
21 the patients had quit smoking more than 21 years earlier showed higher MDA-LDL levels than  
22  
23  
24 did the non-smoking group (*Fig. 2-D*). This suggests that MDA-LDL level will never  
25  
26  
27 completely recover once a subject has started smoking.  
28  
29  
30  
31

### 32 *Clinical factors affecting MDA-LDL level identified in multiple regression analysis*

33  
34  
35 To assess the independent determinants of MDA-LDL level, a multiple regression analysis was  
36  
37  
38 performed. After removing the confounding factors, MDA-LDL level was shown to be  
39  
40  
41 positively correlated with LDL-C level ( $p < 0.001$ ), Brinkman index ( $p = 0.009$ ) and a male gender  
42  
43  
44 ( $p = 0.019$ ) (Table 2).  
45

46 **Table 2 Multiple Regression Analysis**  
47

| 48                   | 49                      | 50             | 51                               | 52      | 53     | 54 |
|----------------------|-------------------------|----------------|----------------------------------|---------|--------|----|
| Significant variable | Regression coefficients | Standard error | Standard regression coefficients | F       | p      |    |
| 55                   | 56                      | 57             | 58                               | 59      | 60     |    |
| LDL-C                | 0.675                   | 0.06           | 0.429                            | 128.089 | <0.001 |    |

|                |        |       |       |        |       |
|----------------|--------|-------|-------|--------|-------|
| Brinkman index | 0.008  | 0.003 | 0.105 | 71.502 | 0.009 |
| Gender         | 11.511 | 4.908 | 0.94  | 49.901 | 0.019 |

Objective variable: MDA-LDL

Explanatory variable: BMI, Age, Gender, brinkman index, Cr, BNP, LDL-C, HbA1c, HT

No significant variables: BMI, Age, Cr, BNP, HbA1c, HT

### *Effects of statin therapy on the correlations of smoking status with MDA-LDL or LDL-cholesterol level*

The correlations of the smoking status with MDA-LDL/LDL-C level were investigated after patients were divided into two groups; those with or without statin treatment (*Fig. 3*). In non-statin-treated group, M-LDL level as well as MDA-LDL/LDL-C ratio, was significantly increased in ex-/current smokers compared to those in non-smokers, although there was no significant differences in LDL-C levels between the subjects with the different smoking status. LDL-C level was not significantly different in non-statin-treated and statin-treated groups.

### **Discussion**

In this study, we investigated the factors associated with MDA-LDL level in high risk patients requiring cardiac catheterization. According to a multivariate analysis, Brinkman index, as well as the LDL-C level and gender were found to be significantly associated with MDA-LDL level. Furthermore, we found that smoking cessation was not effective for reducing MDA-LDL level,

1  
2  
3  
4  
5  
6 even after the patients had quit smoking for many years. However, we found evidence that  
7  
8  
9 statin treatment may reduce MDA-LDL level, which could possibly help in the treatment of  
10  
11  
12 smokers.

13  
14  
15 It has been reported that smoking may affect susceptibility of plasma LDL to peroxidative  
16  
17  
18 modification. Modified LDL has been shown to be the preferred substrate for macrophages and  
19  
20  
21 induces their subsequent transformation into foam cells <sup>11 12</sup>. Thus, oxidative stress is very  
22  
23  
24 important for synthesis of modified-LDL. However, it is noteworthy that MDA-LDL level was  
25  
26  
27 emphatically influenced by smoking but not by obesity (estimated by BMI), hypertension,  
28  
29  
30 diabetes mellitus (estimated by HbA1c level), renal failure (estimated by Cr level) or heart  
31  
32  
33 failure (estimated by BNP level) by the multivariate analysis in this study, though all of these  
34  
35  
36 clinical characteristics have been shown to increase oxidative stress. The precise mechanisms by  
37  
38  
39 which smoking increases MDA-LDL level remain unclear at present.

40  
41  
42 The current study clearly showed that smoking was substantially harmful with regard to  
43  
44  
45 increasing MDA-LDL level. When we examined the effect of smoking status on MDA-LDL  
46  
47  
48 level among the non-smokers, ex-smokers and current smokers, we found that MDA-LDL level  
49  
50  
51 was still higher in the ex-smokers than in the non-smokers and was unexpectedly similar to the  
52  
53  
54 level in the current smokers. Furthermore, we examined the effects of the period of smoking  
55  
56  
57 cessation and the analysis indicated that even many years after smoking cessation, there was no  
58  
59  
60

1  
2  
3  
4  
5  
6 significant reduction of MDA-LDL level. This result suggests that smoking should never be  
7  
8  
9 started, and that if started, it is important to quit smoking as soon as possible before becoming a  
10  
11  
12 heavy smokers.

13  
14 The present results suggests that smoking keeps MDA-LDL level elevated for a long time.  
15  
16  
17 Therefore, a method for lowering MDA-LDL level is especially needed for smokers. One  
18  
19  
20 possible candidate would be statin therapy. Statins facilitate the LDL uptake in hepatocytes,  
21  
22  
23 decrease old LDL (which is easily oxidized), and thereby reduce the risk of LDL oxidization <sup>13</sup>.  
24  
25  
26 The decreases in fatty acids and cholesterol in the lipoprotein are also likely to lead to a  
27  
28  
29 decrease in oxidization <sup>14</sup>. In the current study, we examined the effects of statin treatment on  
30  
31  
32 MDA-LDL levels between non-smokers and smokers. MDA-LDL level was found to be  
33  
34  
35 significantly higher in smokers than in non-smokers in the stain (-) group. On the other hand,  
36  
37  
38 the effect of smoking on LDL-C level was not seen in the statin (+) group, the levels were  
39  
40  
41 similar between smokers and non-smokers. The ratio of MDA-LDL/LDL-C showed a similar  
42  
43  
44 result. These results may suggest that statin therapy can reduces MDA-LDL level in smokers to  
45  
46  
47 a level similar to that in non-smokers.

48  
49 It has been reported that cigarette smoking is one of the risk factors for organic stenosis but that  
50  
51  
52 it does not act alone in contributing to the progression of atherosclerosis <sup>14 15</sup>. In addition  
53  
54  
55 atherosclerosis was not produced by smoking alone in animal models <sup>16</sup>. However, cigarette  
56  
57  
58  
59  
60



1  
2  
3  
4  
5  
6 smoking acts in concert with other risk factors such as hypercholesterolemia to accelerate  
7  
8 atherosclerosis<sup>14 15 17 18 19</sup>. The current study is in agreement with the previous reports.  
9  
10  
11 Importantly, it has been shown that among other risk factors cigarette smoking alone is a highly  
12  
13 significant risk factor for coronary spasm<sup>20 21 22 23 24</sup> and treatment with fluvastatin reduced the  
14  
15 coronary spasm<sup>25</sup>. Thus, smoking cessation combined with statin therapy would be beneficial  
16  
17 for prevention of ischemic heart disease by reducing progression of atherosclerosis and  
18  
19 suppressing coronary spasm.  
20  
21  
22  
23  
24  
25  
26  
27  
28

### 29 **Conclusion**

30  
31  
32 We found that MDA-LDL level was affected by multiple factors such as smoking status (as  
33  
34 indicated by Brinkman index), LDL-C level and gender. In addition to its other health effects,  
35  
36 smoking should be strongly prohibited due to its harmful effects from MDA-LDL standpoint.  
37  
38

39  
40 We recommend that patients should never smoke, but that once smoking has started, it is  
41  
42 essential to quit smoking as early as possible and to cut back on the number of cigarettes  
43  
44 consumed. Furthermore, statin therapy might have a beneficial effect on the reduction of MDA-  
45  
46  
47  
48  
49  
50  
51  
52  
53  
54  
55  
56  
57  
58  
59  
60  
LDL level.

### 52 **Contributorship Statement:**

55  
56  
57  
58  
59  
60  
KO collected the data, performed the statistical analyses, and wrote the manuscript.

1  
2  
3  
4  
5  
6 TT and TN conceived of the research hypothesis and analyses, wrote and edited the  
7  
8  
9 manuscript. HS and SA performed the statistical analyses and edited the manuscript.  
10  
11  
12 KM and TO participated in the design and coordination of the study and collected the  
13  
14  
15 data. MY conceived of the study, and participated in its coordination and edited the  
16  
17  
18 manuscript. All authors read and approved the final manuscript.  
19

20  
21 **Competing Interests:** None  
22

23  
24 **Data Sharing Statement:** No additional data are available  
25  
26  
27  
28  
29  
30  
31  
32  
33  
34  
35  
36  
37  
38  
39  
40  
41  
42  
43  
44  
45  
46  
47  
48  
49  
50  
51  
52  
53  
54  
55  
56  
57  
58  
59  
60

## References

1. Kotani K, Maekawa M, Kanno T, et al. Distribution of immunoreactive malondialdehyde-modified low-density lipoprotein in human serum. *Biochimica et biophysica acta* 1994;**1215**(1-2):121-5.
2. Kitano S, Kanno T, Maekawa M, et al. Improved method for the immunological detection of malondialdehyde-modified low-density lipoproteins in human serum. *Analytica Chimica Acta* 2004;**509**(2):229-35.
3. Kondo A, Manabe M, Saito K, et al. Insulin treatment prevents LDL from accelerated oxidation in patients with diabetes. *Journal of atherosclerosis and thrombosis* 2002;**9**(6):280-7.
4. Kondo A, Muranaka Y, Ohta I, et al. Relationship between triglyceride concentrations and LDL size evaluated by malondialdehyde-modified LDL. *Clinical chemistry* 2001;**47**(5):893-900.
5. Kondo A, Li J, Manabe M, et al. Relationship between high-density lipoprotein-cholesterol and malondialdehyde-modified low-density lipoprotein concentrations. *Journal of atherosclerosis and thrombosis* 2003;**10**(2):72-8.
6. Tanaga K, Bujo H, Inoue M, et al. Increased circulating malondialdehyde-modified LDL levels in patients with coronary artery diseases and their association with peak sizes of LDL particles. *Arteriosclerosis, thrombosis, and vascular biology* 2002;**22**(4):662-6.
7. Shigematsu S, Takahashi N, Hara M, et al. Increased incidence of coronary in-stent restenosis in type 2 diabetic patients is related to elevated serum malondialdehyde-modified low-density lipoprotein. *Circulation journal : official journal of the Japanese Circulation Society* 2007;**71**(11):1697-702.
8. Yagi H, Komukai K, Hashimoto K, et al. Difference in risk factors between acute coronary syndrome and stable angina pectoris in the Japanese: smoking as a crucial risk factor of acute coronary syndrome. *Journal of cardiology* 2010;**55**(3):345-53.
9. Sekiyama H, Nagoshi T, Komukai K, et al. Transient decrease in serum potassium level during ischemic attack of acute coronary syndrome: paradoxical contribution of plasma glucose level and glycohemoglobin. *Cardiovascular diabetology* 2013;**12**:4.
10. Brinkman GL, Coates EO, Jr. The effect of bronchitis, smoking, and occupation on ventilation. *The American review of respiratory disease* 1963;**87**:684-93.
11. Yokode M, Kita T, Arai H, et al. Cholesteryl ester accumulation in macrophages incubated with low density lipoprotein pretreated with cigarette smoke extract. *Proceedings of the National Academy of Sciences of the United States of America*

- 1  
2  
3  
4  
5 1988;**85**(7):2344-8.  
6  
7 12. Harats D, Ben-Naim M, Dabach Y, et al. Cigarette smoking renders LDL susceptible to  
8 peroxidative modification and enhanced metabolism by macrophages.  
9 Atherosclerosis 1989;**79**(2-3):245-52.  
10  
11 13. Gotto AM. Interactions of the major risk factors for coronary heart disease. The  
12 American Journal of Medicine 1986;**80**(2):48-55.  
13  
14 14. Willett WC, Green A, Stampfer MJ, et al. Relative and absolute excess risks of coronary  
15 heart disease among women who smoke cigarettes. The New England journal of  
16 medicine 1987;**317**(21):1303-9.  
17  
18 15. Stein Y, Harats D, Stein O. Why is smoking a major risk factor for coronary heart  
19 disease in hyperlipidemic subjects? Annals of the New York Academy of Sciences  
20 1993;**686**:66-9; discussion 69-71.  
21  
22 16. Asano M, Ohkubo C, Hirokawa A, et al. Smoking Research Foundation Annual Research  
23 Report, On macro- and microcirculatory effects of tobacco smoke inhalation on  
24 atherogenesis in the rabbit. 1987:251-61.  
25  
26 17. Anderson KM, Wilson PW, Odell PM, et al. An updated coronary risk profile. A  
27 statement for health professionals. Circulation 1991;**83**(1):356-62.  
28  
29 18. Gotto AM, Jr. Interactions of the major risk factors for coronary heart disease. Am J  
30 Med 1986;**80**(2a):48-55.  
31  
32 19. Holbrook JH, Grundy SM, Hennekens CH, et al. Cigarette smoking and cardiovascular  
33 diseases. A statement for health professionals by a task force appointed by the  
34 steering committee of the American Heart Association. Circulation  
35 1984;**70**(6):1114a-17a.  
36  
37 20. Caralis DG, Deligonul U, Kern MJ, et al. Smoking is a risk factor for coronary spasm in  
38 young women. Circulation 1992;**85**(3):905-9.  
39  
40 21. Sugiishi M, Takatsu F. Cigarette smoking is a major risk factor for coronary spasm.  
41 Circulation 1993;**87**(1):76-9.  
42  
43 22. Yoshimura M, Yasue H, Nakayama M, et al. A missense Glu298Asp variant in the  
44 endothelial nitric oxide synthase gene is associated with coronary spasm in the  
45 Japanese. Human genetics 1998;**103**(1):65-9.  
46  
47 23. Nakayama M, Yasue H, Yoshimura M, et al. T-786->C mutation in the 5'-flanking  
48 region of the endothelial nitric oxide synthase gene is associated with coronary  
49 spasm. Circulation 1999;**99**(22):2864-70.  
50  
51 24. Takaoka K, Yoshimura M, Ogawa H, et al. Comparison of the risk factors for coronary  
52 artery spasm with those for organic stenosis in a Japanese population: role of  
53 cigarette smoking. International journal of cardiology 2000;**72**(2):121-6.  
54  
55  
56  
57  
58  
59  
60

- 1  
2  
3  
4  
5 25. Yasue H, Mizuno Y, Harada E, et al. Effects of a 3-hydroxy-3-methylglutaryl coenzyme A  
6 reductase inhibitor, fluvastatin, on coronary spasm after withdrawal of calcium-  
7 channel blockers. *Journal of the American College of Cardiology* 2008;**51**(18):1742-8.  
8  
9  
10  
11  
12  
13  
14  
15  
16  
17  
18  
19  
20  
21  
22  
23  
24  
25  
26  
27  
28  
29  
30  
31  
32  
33  
34  
35  
36  
37  
38  
39  
40  
41  
42  
43  
44  
45  
46  
47  
48  
49  
50  
51  
52  
53  
54  
55  
56  
57  
58  
59  
60

For peer review only

**Figure legends**

*Fig. 1 Correlations of MDA-LDL level with various clinical factors*

The clinical factors affecting MDA-LDL level are shown in (A)-(H).

*Fig. 2 Correlation of smoking status with MDA-LDL and LDL-cholesterol levels*

Correlation between MDA-LDL level and Brinkman index (A) and, between LDL-C level and Brinkman index (B) was determined with a linear regression analysis. Comparison of MDA-LDL levels among non-smokers, ex-smokers and current smokers (C). Comparison of MDA-LDL levels in each patient group among non-smokers and ex-smokers who had quit more than 21 years earlier, ex-smokers who had quit 11 to 20 years ago, ex-smokers who had quit less than 10 years ago and current smokers (D).

*Fig. 3 Effects of the statin therapy on the correlations of smoking status with MDA-LDL or LDL-cholesterol level*

The correlations of the smoking status with MDA-LDL and LDL-C levels were investigated after dividing the patients into two groups; with (A) or without (B) statin treatment.

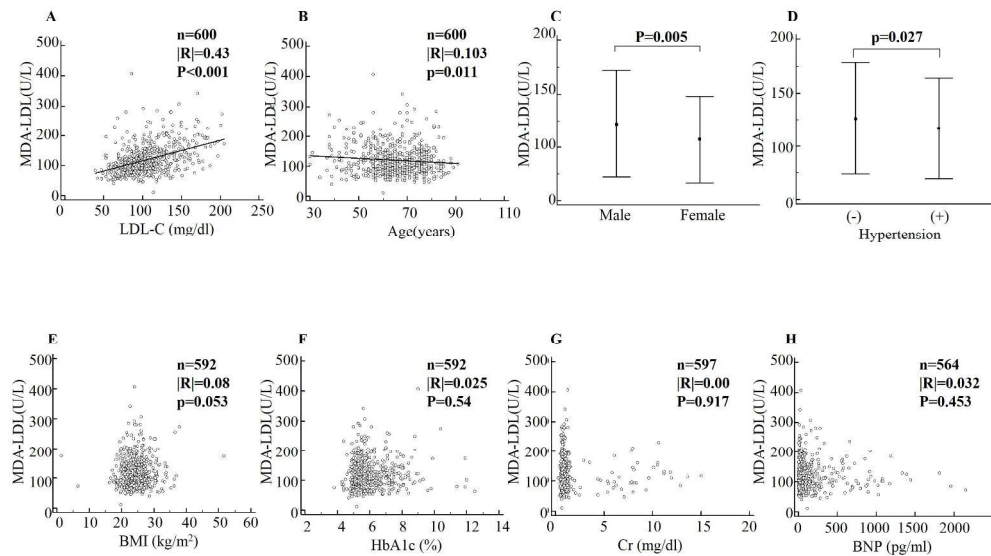

Figure 1

Fig. 1 Correlations of MDA-LDL level with various clinical factors /The clinical factors affecting MDA-LDL level are shown in (A)-(H).

254x190mm (300 x 300 DPI)

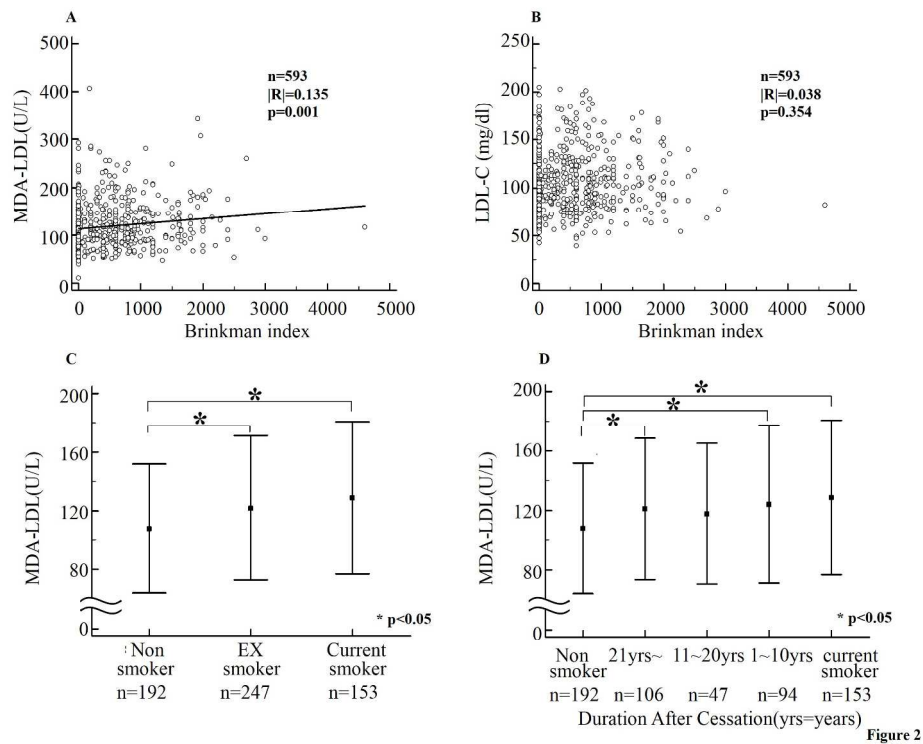

Figure 2

Fig. 2 Correlation of smoking status with MDA-LDL and LDL-cholesterol levels / Correlation between MDA-LDL level and Brinkman index (A) and, between LDL-C level and Brinkman index (B) was determined with a linear regression analysis. Comparison of MDA-LDL levels among non-smokers, ex-smokers and current smokers (C). Comparison of MDA-LDL levels in each patient group among non-smokers and ex-smokers who had quit more than 21 years earlier, ex-smokers who had quit 11 to 20 years ago, ex-smokers who had quit less than 10 years ago and current smokers (D).

254x190mm (300 x 300 DPI)



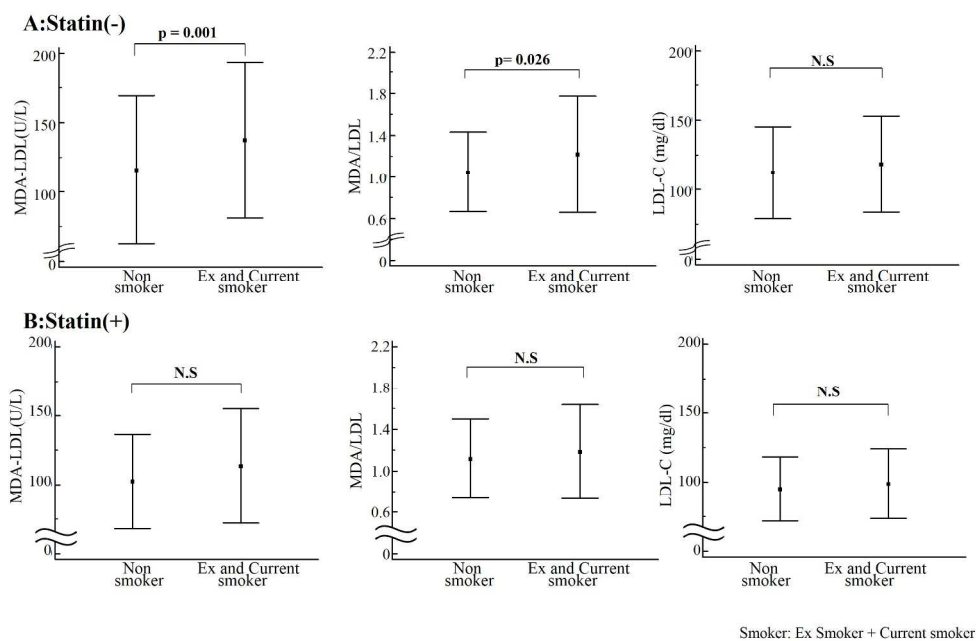

Figure 3

Fig. 3 Effects of the statin therapy on the correlations of smoking status with MDA-LDL or LDL-cholesterol level / The correlations of the smoking status with MDA-LDL and LDL-C levels were investigated after dividing the patients into two groups; with (A) or without (B) statin treatment.

254x190mm (300 x 300 DPI)

# BMJ Open

## Increase in the Oxidized Low-Density Lipoprotein Level by Smoking and the Possible Inhibitory Effect of Statin Therapy in Patients with Cardiovascular Disease.

|                                 |                                                                                                                                                                                                                                                                                                                                                                                                                                                                                                                                                                                                                                                                                                                                                                                                                                                                                                                                                                           |
|---------------------------------|---------------------------------------------------------------------------------------------------------------------------------------------------------------------------------------------------------------------------------------------------------------------------------------------------------------------------------------------------------------------------------------------------------------------------------------------------------------------------------------------------------------------------------------------------------------------------------------------------------------------------------------------------------------------------------------------------------------------------------------------------------------------------------------------------------------------------------------------------------------------------------------------------------------------------------------------------------------------------|
| Journal:                        | <i>BMJ Open</i>                                                                                                                                                                                                                                                                                                                                                                                                                                                                                                                                                                                                                                                                                                                                                                                                                                                                                                                                                           |
| Manuscript ID:                  | bmjopen-2014-005455.R1                                                                                                                                                                                                                                                                                                                                                                                                                                                                                                                                                                                                                                                                                                                                                                                                                                                                                                                                                    |
| Article Type:                   | Research                                                                                                                                                                                                                                                                                                                                                                                                                                                                                                                                                                                                                                                                                                                                                                                                                                                                                                                                                                  |
| Date Submitted by the Author:   | 16-Nov-2014                                                                                                                                                                                                                                                                                                                                                                                                                                                                                                                                                                                                                                                                                                                                                                                                                                                                                                                                                               |
| Complete List of Authors:       | Ogawa, Kazuo; The Jikei University School of Medicine, Division of Cardiology, Department of Internal Medicine<br>Tanaka, Toshikazu; The Jikei University School of Medicine, Division of Cardiology, Department of Internal Medicine<br>Nagoshi, Tomohisa; The Jikei University School of Medicine, Division of Cardiology, Department of Internal Medicine<br>Sekiyama, Hiroshi; The Jikei University School of Medicine, Division of Cardiology, Department of Internal Medicine<br>Arase, Satoshi; The Jikei University School of Medicine, Division of Cardiology, Department of Internal Medicine<br>Minai, Kosuke; The Jikei University School of Medicine, Division of Cardiology, Department of Internal Medicine<br>Ogawa, Takayuki; The Jikei University School of Medicine, Division of Cardiology, Department of Internal Medicine<br>Yoshimura, Michihiro; The Jikei University School of Medicine, Division of Cardiology, Department of Internal Medicine |
| <b>Primary Subject Heading</b>: | Cardiovascular medicine                                                                                                                                                                                                                                                                                                                                                                                                                                                                                                                                                                                                                                                                                                                                                                                                                                                                                                                                                   |
| Secondary Subject Heading:      | Smoking and tobacco, Epidemiology                                                                                                                                                                                                                                                                                                                                                                                                                                                                                                                                                                                                                                                                                                                                                                                                                                                                                                                                         |
| Keywords:                       | Coronary heart disease < CARDIOLOGY, Lipid disorders < DIABETES & ENDOCRINOLOGY, Cardiology < INTERNAL MEDICINE                                                                                                                                                                                                                                                                                                                                                                                                                                                                                                                                                                                                                                                                                                                                                                                                                                                           |
|                                 |                                                                                                                                                                                                                                                                                                                                                                                                                                                                                                                                                                                                                                                                                                                                                                                                                                                                                                                                                                           |

SCHOLARONE™  
Manuscripts

1  
2  
3  
4  
5  
6 **Increase in the Oxidized Low-Density Lipoprotein Level by Smoking and the Possible**

7  
8  
9 **Inhibitory Effect of Statin Therapy in Patients with Cardiovascular Disease:**

10  
11  
12 **a Retrospective Study**

13  
14  
15  
16  
17  
18 Kazuo Ogawa, MD. ; Toshikazu Tanaka, MD. PhD. ; Tomohisa Nagoshi, MD. PhD. ;

19  
20  
21 Hiroshi Sekiyama, MD. PhD. ; Satoshi Arase, MD. ; Kosuke Minai, MD. PhD. ;

22  
23  
24 Takayuki Ogawa, MD. PhD. and Michihiro Yoshimura, MD. PhD.

25  
26  
27 Division of Cardiology, Department of Internal Medicine,

28  
29  
30 The Jikei University School of Medicine, Tokyo, Japan

31  
32  
33  
34  
35 All correspondence should get to Kazuo Ogawa, MD

36  
37 Division of Cardiology, Department of Internal Medicine

38  
39 The Jikei University School of Medicine

40  
41 3-25-8, Nishi-Shinbashi, Minato-ku

42  
43 Tokyo, Japan 105-8461

44  
45 Telephone: +81-3-3433-1111

46  
47 FAX: +81-3-3433-3459

48  
49 E-mail: [oga-n@jikei.ac.jp](mailto:oga-n@jikei.ac.jp)

50  
51  
52 This author takes responsibility for all aspects of the reliability and freedom from bias of the  
53 data presented and their discussed interpretation

54  
55  
56 **Keywords:** MDA-LDL; Smoking; Oxidative stress; Coronary artery disease; Statin therapy

57  
58  
59 **Word count:** 2650

**Abstract**

## Objectives:

MDA-LDL level is a marker of oxidative stress and is linked to progression of arteriosclerosis; however, the clinical factors affecting to the oxidized LDL level have not been elucidated. We herein investigated various factors to identify correlation with MDA-LDL level in high risk patients requiring catheter intervention.

## Setting:

Secondary care (cardiology), single center study

## Participants:

600 patients who were admitted to our hospital and underwent cardiac catheterization

## Primary and secondary outcome measures:

Blood samples were obtained to measure lipid profiles and MDA-LDL level.

## Results:

With regard to smoking status, MDA-LDL level was significantly higher in ex-/current smokers compared with non-smokers. Of note, there was no improvement of MDA-LDL level even in patients who quitted smoking. Multiple regression analysis showed that MDA-LDL level was positively correlated with LDL-cholesterol level, Brinkman index and male gender. The correlation between smoking status and either MDA-LDL or LDL-C level was investigated in

1  
2  
3  
4  
5  
6 two groups; namely, patients, with or without statin treatment. In non-statin group, MDA-LDL  
7  
8  
9 level and MDA-LDL/LDL-C ratio were significantly higher in ex-/current smokers compared  
10  
11  
12 with non-smoker, while no significant correlation was observed between smoking status and  
13  
14  
15 LDL-C level. In contrast, in statin group, there were no significant correlations between  
16  
17  
18 smoking status and all any of these cholesterol parameters.  
19

#### 20 Conclusions:

21  
22  
23 We found that MDA-LDL level was affected by multiple factors, such as smoking status,  
24  
25  
26 LDL-C level and male gender. The present findings give additional evidence that smoking  
27  
28  
29 should be prohibited from MDA-LDL standpoint. Furthermore, statin therapy might have a  
30  
31  
32 beneficial effect on the reduction of MDA-LDL level.  
33

34  
35 Trial registration: N/A  
36  
37  
38  
39

#### 40 **Main strengths**

41  
42 Although oxidative LDL is associated with the marker of oxidative stress and the progression of  
43  
44  
45 atherosclerosis, clinical factor which affects the oxidative LDL remains uncertain. Our study  
46  
47  
48 revealed that MDA-LDL was associated with smoking and MDA-LDL level would never  
49  
50  
51 decrease with smoking cessation. However, MDA-LDL level was decreasing even in smokers  
52  
53  
54 with statin therapy.  
55

#### 56 **Study limitations**

1  
2  
3  
4  
5  
6 Smoking cessation was not found to be effective for reducing MDA-LDL level in this study;  
7  
8  
9 however, favorable effects of smoking cessation would likely occur with regard to other  
10  
11 parameters than MDA-LDL level. Thus smoking cessation is recommended at any time, even  
12  
13 after long-term smoking, and is considered to provide cardiovascular health benefits.  
14  
15

16  
17 This was a retrospective study, and the true effect of statin on MDA-LDL level remains  
18  
19 uncertain. Finally, we did not examine the prognosis of the study population and therefore, the  
20  
21 effect of smoking cessation and/or statin therapy remains uncertain, especially in terms of their  
22  
23 impact on MDA-LDL level. Prospective studies should be required to obtain answers regarding  
24  
25 their topics.  
26  
27  
28  
29  
30  
31  
32  
33  
34  
35  
36  
37  
38  
39  
40  
41  
42  
43  
44  
45  
46  
47  
48  
49  
50  
51  
52  
53  
54  
55  
56  
57  
58  
59  
60

## Introduction

The malondialdehyde modified low-density lipoprotein (MDA-LDL; oxidized LDL) is LDL that has been modified by MDA, leading to the production of a large amount of aldehyde when LDL becomes degenerated and oxidized <sup>1</sup>.

It is known that MDA-LDL level is elevated in patients with dyslipidemia and diabetes mellitus (DM), both risks factors for atherosclerotic disease <sup>2,3</sup>. Since MDA-LDL level has a positive correlation with the serum LDL level, the ratio of MDA-LDL/LDL-C (M/L) is used to evaluate the severity of oxidization of LDL; in some reports, not only MDA-LDL level, but also M/L ratio has been shown to increase in patients with DM compared with controls <sup>4,5</sup>.

In patients with coronary artery disease (CAD), MDA-LDL level and M/L ratio have been shown to increase even when there are no other differences in the other lipid profiles <sup>6</sup>. In addition, it has been shown that the measurement of MDA-LDL level might be useful as a predictor of restenosis after percutaneous coronary intervention in patients with DM <sup>7</sup>. Based on these findings, it has been speculated that MDA-LDL level might be important marker of the progression of arteriosclerosis; however, the clinical factors possibly affecting MDA-LDL level have not been elucidated. Therefore, in the present study, we investigated “the clinical factors” affecting MDA-LDL level in high risk patients requiring catheter intervention.

## Methods

### *Study patients*

Six hundred consecutive patients who underwent cardiac catheterization from March 2010 to September 2011 were examined in this study. The baseline patient characteristics, including the clinical parameters and the biochemical data, were collected retrospectively from the hospital medical records. In addition, the results of the catheterization (i.e. the number of occluded or narrowed vessels), body weight, body mass index (BMI), coronary risk factors and medication profiles were also investigated. The patients taking eicosapentaenoic acid (EPA) were excluded since it has been demonstrated that EPA is major lipid-lowering agents with potent antioxidant effects. This study was approved by the ethics committee of the Jikei University School of Medicine (Study protocol: 24-150[6916]); and we complied with the routine ethical regulation of our institution as follows. This is a retrospective study and the informed consent could not be obtained from each patient. Instead of informed consent from each patient, we publicly posted a notice about the study design and contact information at a publicly-known space in our institution.

### *Data collection*

Blood sampling was performed to examine the serum MDA-LDL, serum creatinine,



1  
2  
3  
4  
5  
6 hemoglobin A1c (HbA1c), B-type (brain) natriuretic peptide (BNP) and low-density lipoprotein  
7  
8  
9 cholesterol (LDL-C) levels. The previous study reported by Tismikas et al.<sup>8</sup> encompassed that  
10  
11  
12 PCI would affect the oxidative LDL level. To avoid the modification of LDL level by PCI, we  
13  
14  
15 tried to take a blood draw immediately before the cardiac catheterization or at the outpatient  
16  
17  
18 clinic before admission. MDA-LDL level was measured by an ELISA using an anti-MDA-LDL  
19  
20  
21 monoclonal antibody (ML25) and  $\beta$ -galactosidase anti-apoB monoclonal antibody (AB16)<sup>1</sup>. It  
22  
23  
24 is well known that the combination of ML25 and AB16 can accurately detect MDA-LDL<sup>1</sup>. The  
25  
26  
27 concentration of MDA-LDL is defined at 1 mg/L of MDA-LDL produced artificially, which  
28  
29  
30 shows the same signal as 1U/L of MDA-LDL in the serum. Serum levels of LDL cholesterol  
31  
32  
33 was determined enzymatically. (Sekisui Medical Co., Ltd., Tokyo, Japan)

34  
35 Diabetes mellitus (DM), hypertension and smoking were defined as described previously<sup>9 10</sup>.  
36  
37  
38 Dyslipidemia was diagnosed with the use of lipid-lowering agents, the presence of 1 or more  
39  
40  
41 of the following 3 lipid disorders at first fasting blood sampling or both: a low-density  
42  
43  
44 lipoprotein (LDL) cholesterol level  $\geq 140$  mg/dL, a triglyceride level  $\geq 150$  mg/dL, and a  
45  
46  
47 high-density lipoprotein (HDL) cholesterol level  $< 40$  mg/dL<sup>9</sup>. Blood sampling was performed  
48  
49  
50 on the day of the catheter examination, except for the case that has already been performed at  
51  
52  
53 outpatient clinic. Among 600 patients, 342 were performed on the day of the catheter  
54  
55  
56 examination, and remaining 258 were at outpatient.  
57  
58  
59  
60

1  
2  
3  
4  
5  
6 The definition of smoking status is as follows: current smokers were those who were smoking at  
7  
8  
9 the time of the study or who had smoked in the past year; the subjects who had quit smoking  
10  
11  
12 more than one year before the study were defined as ex-smokers and those who had never  
13  
14  
15 smoked were defined as non-smokers. Brinkman Index was used to evaluate the smoking status  
16  
17  
18 of current/ex-smokers<sup>11</sup>.  
19

### 20 21 22 23 *Statistical analysis*

24  
25  
26 Comparisons between MDA-LDL level and LDL-C level, age, BMI, HbA1c, Cr, BNP and  
27  
28  
29 Brinkman index were performed with a linear regression analysis. Comparison between  
30  
31  
32 Brinkman index and LDL-C was also performed with a linear regression analysis. Comparisons  
33  
34  
35 of MDA-LDL level between males and females, subjects with or without hypertension,  
36  
37  
38 non-smokers versus ex-smokers versus current smokers, and among the various patient groups  
39  
40  
41 after smoking cessation were performed with Mann-Whitney U test. Kruskal Wallis test was  
42  
43  
44 performed to evaluate the difference of MDA-LDL (C) and LDL-C (D) among 4 groups divided  
45  
46  
47 by Brinkman index. Multiple factors, which were considered to possibly modify MDA-LDL  
48  
49  
50 levels were evaluated with a stepwise multiple regression analysis. Comparison of LDL-C and  
51  
52  
53 MDA-LDL level and M/L ratio between non-smokers and smokers were performed with  
54  
55  
56 Mann-Whitney U test.  
57  
58  
59  
60

1  
2  
3  
4  
5  
6  
7  
8  
9  
10  
11  
12  
13  
14  
15  
16  
17  
18  
19  
20  
21  
22  
23  
24  
25  
26  
27  
28  
29  
30  
31  
32  
33  
34  
35  
36  
37  
38  
39  
40  
41  
42  
43  
44  
45  
46  
47  
48  
49  
50  
51  
52  
53  
54  
55  
56  
57  
58  
59  
60

A value of  $p < 0.05$  was considered to be statistically significant for all data that were statistically analyzed using the SPSS software package, version 21.0 (SPSS Inc., Chicago, IL).

For peer review only

## Results

### *Baseline characteristics*

The baseline characteristics of the patients in this study were shown in Table 1. The average age was  $64.8 \pm 11.4$  years old and 80.3% of them were male. The percentages of non-smokers, ex-smokers and current smokers were 32%, 42% and 26%, respectively. The average LDL-C level and MDA-LDL level were  $106.1 \pm 30.8$  mg/dl and  $119.2 \pm 48.7$  U/L, respectively. The percentage of patients taking statin therapy was 55.3%. In addition, patient characteristics divided by smoking status into 3 groups (non-smokers, ex-smokers, current smokers) were shown in Table 1-3.

**Table 1-1 Patient's Characteristics**

|                                 | <b>N=600</b> | <b>mean <math>\pm</math> SD</b> |
|---------------------------------|--------------|---------------------------------|
| Age, years                      |              | 64.8 $\pm$ 11.4                 |
| Male, gender (%)                |              | 80.3                            |
| Height, cm                      |              | 165.4 $\pm$ 25.1                |
| Weight, kg                      |              | 66.8 $\pm$ 13.3                 |
| BMI, kg/m <sup>2</sup>          |              | 24.4 $\pm$ 3.74                 |
| Non-smoker, N (%)               |              | 192(32.4)                       |
| Ex-smoker, N (%)                |              | 247(41.7)                       |
| Current smoker, N (%)           |              | 153(25.8)                       |
| Cr, mg/dL                       |              | 1.38 $\pm$ 1.94                 |
| eGFR, mL/min/1.73m <sup>2</sup> |              | 62.6 $\pm$ 21.6                 |
| HbA1c, %                        |              | 6.4 $\pm$ 1.1                   |
| BNP, pg/mL                      |              | 140 $\pm$ 263                   |
| LDL-C, mg/dl                    |              | 106.1 $\pm$ 30.8                |
| MDA-LDL,U/L                     |              | 119.2 $\pm$ 48.7                |
| M/L                             |              | 1.16 $\pm$ 0.47                 |

BMI: body mass index, Cr: creatinine, eGFR: estimated glomerular filtration rate, BNP: B-type natriuretic peptide, LDL-C: low-density lipoprotein cholesterol, MDA-LDL: malondialdehyde modified low density lipoprotein, M/L: malondialdehyde modified low density lipoprotein/ low density lipoprotein cholesterol

**Table 1-2 Patient's characteristics**

| Disease                 | N (%)     |
|-------------------------|-----------|
| Diabetes Mellitus       | 252(42.0) |
| Hypertension            | 455(75.5) |
| Dyslipidemia            | 441(73.5) |
| Medicine                | N (%)     |
| Statin                  | 332(55.3) |
| Ezetimibe               | 31(5.2)   |
| Fibrate                 | 13(2.1)   |
| Coronary Artery Disease | N (%)     |
| 0VD                     | 215(35.8) |
| 1VD                     | 249(41.5) |
| 2VD                     | 84(14.0)  |
| 3VD                     | 52(8.7)   |

0VD: 0-vessel disease, 1VD: single-vessel disease, 2VD: double-vessel disease, 3VD: triple-vessel disease

**Table 1-3 Patient's characteristics divided by smoking status**

|                        | Non-smoker | Ex-smoker   | Current smoker |
|------------------------|------------|-------------|----------------|
| Number of patients (%) | 192(32.4)  | 250(42.2)   | 151(25.4)      |
| Age                    | 66.9±12.4  | 65.5±9.5    | 60.9±12.2      |
| Male, gender (%)       | 110(57.3)  | 228(91.2) * | 138(91.4)      |
| Height, cm             | 160.3±11.0 | 166.0±11.8* | 167.4±7.3      |
| Weight, kg             | 62.7±14.0  | 67.7±10.9*  | 70.6±14.8      |
| BMI, kg/m <sup>2</sup> | 24.2±3.6   | 24.3±3.0    | 25.0±4.9       |
| Cr, mg/dL              | 1.2±1.5    | 1.6±2.1     | 1.3±2.1        |

|                         |             |             |              |
|-------------------------|-------------|-------------|--------------|
| HbA1c, %                | 6.3±0.9     | 6.4±1.1     | 6.4±1.1      |
| BNP, pg/mL              | 167.1±302.0 | 133.2±264.8 | 120.7±201.1  |
| LDL-C, mg/dL            | 102.3±29.1  | 104.2±28.4  | 114.8±35.2** |
| MDA-LDL, U/L            | 108.0±43.6  | 122.1±49.2* | 129.3±52.1   |
| M/L                     | 2.06±0.85   | 2.26±0.82   | 2.6±0.99     |
| LVEF, %                 | 60.2±10.0   | 56.7±9.6*   | 54.4±12.1    |
| Diabetes Mellitus       | 72(37.5)    | 112(44.8)   | 65(43.0) *   |
| Hypertension            | 155(80.7)   | 191(76.4)   | 104(68.9) *  |
| Dyslipidemia            | 134(69.8)   | 185(74.0)   | 116(76.8)    |
| Statin                  | 111(57.8)   | 146(58.4)   | 73(48.3)     |
| Ezetimibe               | 10(3.6)     | 14(5.6)     | 7(4.6)       |
| Fibrate                 | 2(1.0)      | 6(2.4)      | 5(3.3)       |
| Coronary Artery Disease |             |             |              |
| 0VD                     | 82(42.7)    | 83(33.2)    | 49(32.5)     |
| 1VD                     | 69(35.9)    | 105(42.0)   | 71(47.0) *   |
| 2VD                     | 26(13.5)    | 34(42.0)    | 22(14.6)     |
| 3VD                     | 15(7.8)     | 28(7.2)     | 9(6.0)       |

\*: P<0.05 vs. Non-smoker, \*\*: P<0.05 vs. Ex-smoker

#### *Clinical factors affecting MDA-LDL level*

To elucidate the determinants of MDA-LDL level, a simple regression analysis was performed.

(Fig. 1) MDA-LDL level showed a significantly positive correlation with LDL-C level (Fig.

1A) and a negative correlation with age. (Fig. 1B) In addition, MDA-LDL level was

1  
2  
3  
4  
5  
6 significantly higher in male as well as patient without hypertension. (Figs. 1C, D) BMI, HbA1c,  
7  
8  
9 Cr and BNP level had no impact on MDA-LDL level. (Figs. 1E-H)

#### 10 11 12 13 14 15 *Correlation of smoking status with MDA-LDL level*

16  
17  
18 Next, the impact of smoking status on MDA-LDL level was performed. MDA-LDL, but not  
19  
20  
21 LDL-C, showed a significantly positive correlation with the smoking profiles indicated by  
22  
23  
24 Brinkman index. (Fig. 2-1-A, B) However, considering the bias of the Brinkman distribution, in  
25  
26  
27 addition to Fig. 2-1-A, B, MDA-LDL level and LDL-C level were analyzed with dividing by  
28  
29  
30 Brinkman index into 4 groups. There was a significant difference of MDA-LDL level between  
31  
32  
33 non-smoker and current-smoker, whereas there was no significant difference of LDL-C  
34  
35  
36 regardless of the smoking status. (Fig. 2-1C, D)

37  
38 The patients were subsequently divided into three groups according to their smoking status:  
39  
40  
41 Non-, ex- and current smokers. MDA-LDL level was significantly higher in both ex- and  
42  
43  
44 current smokers compared to that in non-smokers. (Fig. 2-2-E) Moreover, when patients were  
45  
46  
47 compared based on the number of years after smoking cessation, not only current smoking  
48  
49  
50 group, but also group that had quit smoking within 10 years and that where the patients had quit  
51  
52  
53 smoking more than 21 years earlier showed higher MDA-LDL levels than did non-smoking  
54  
55  
56 group (Fig. 2-2-F).



*Clinical factors affecting MDA-LDL level identified in multiple regression analysis*

To assess the independent determinants of MDA-LDL level, a multiple regression analysis was performed. After removing the confounding factors, MDA-LDL level was shown to be positively correlated with LDL-C level ( $p<0.001$ ), Brinkman index ( $p=0.009$ ) and a male gender ( $p=0.019$ ) (Table 2).

**Table 2 Multiple Regression Analysis**

| Significant variable | Regression coefficients | Standard error | Standard regression coefficients | F       | p      |
|----------------------|-------------------------|----------------|----------------------------------|---------|--------|
| LDL-C                | 0.675                   | 0.06           | 0.429                            | 128.089 | <0.001 |
| Brinkman index       | 0.008                   | 0.003          | 0.105                            | 71.502  | 0.009  |
| Gender               | 11.511                  | 4.908          | 0.94                             | 49.901  | 0.019  |

Objective variable: MDA-LDL

Explanatory variable: BMI, Age, Gender, brinkman index, Cr, BNP, LDL-C, HbA1c, HT

No significant variables: BMI, Age, Cr, BNP, HbA1c, HT

*Effects of statin therapy on the correlation of smoking status with MDA-LDL or*

*LDL-cholesterol level*

The correlations of smoking status with MDA-LDL/LDL-C level was investigated after patients were divided into two groups; those with or without statin treatment (*Fig.3*). In

1  
2  
3  
4  
5  
6 non-statin-treated group, MDA-LDL level as well as MDA-LDL/LDL-C ratio, was significantly  
7  
8  
9 increased in ex-/current smokers compared to those in non-smokers, although there was no  
10  
11  
12 significant difference in LDL-C level between the subjects with the different smoking status.  
13  
14  
15 LDL-C level was not significantly different in non-statin-treated and statin-treated groups.  
16  
17  
18  
19

## 20 21 **Discussion**

22  
23 In this study, we investigated the factors associated with MDA-LDL level in high risk patients  
24  
25 requiring cardiac catheterization. According to a multivariate analysis, Brinkman index, as well  
26  
27 as the LDL-C level and gender were found to be significantly associated with MDA-LDL level.  
28  
29  
30 Furthermore, we found that smoking cessation was not effective for reducing MDA-LDL level,  
31  
32  
33 even after the patients had quit smoking for many years. However, we found evidence that statin  
34  
35  
36 treatment may reduce MDA-LDL level, which could possibly help in the treatment of smokers.  
37  
38

39  
40 It has been reported that smoking may affect susceptibility of plasma LDL to peroxidative  
41  
42 modification. Modified LDL has been shown to be the preferred substrate for macrophages and  
43  
44 induces their subsequent transformation into foam cells<sup>12 13</sup>. Thus, oxidative stress is very  
45  
46  
47 important for synthesis of modified-LDL. However, it is noteworthy that MDA-LDL level was  
48  
49  
50 emphatically influenced by smoking but not by obesity (estimated by BMI), hypertension,  
51  
52  
53 diabetes mellitus (estimated by HbA1c level), renal failure (estimated by Cr level) or heart  
54  
55  
56  
57  
58  
59  
60

1  
2  
3  
4  
5  
6 failure (estimated by BNP level) by the multivariate analysis in this study, though all of these  
7  
8  
9 clinical characteristics have been shown to increase oxidative stress. The precise mechanism by  
10  
11  
12 which smoking increases MDA-LDL level remains unclear at present.

13  
14  
15 The current study clearly showed that smoking was substantially harmful with regard to  
16  
17  
18 increasing MDA-LDL level. When we examined the effect of smoking status on MDA-LDL  
19  
20  
21 level among non-smokers, ex-smokers and current smokers, we found that MDA-LDL level was  
22  
23  
24 still higher in ex-smokers than in non-smokers and was unexpectedly similar to the level in  
25  
26  
27 current smokers. Furthermore, we examined the effects of the period of smoking cessation and  
28  
29  
30 the analysis indicated that even many years after smoking cessation, there was no significant  
31  
32  
33 reduction of MDA-LDL level. This result suggests that smoking should never be started, and  
34  
35  
36 that if started, it is important to quit smoking as soon as possible before becoming a heavy  
37  
38  
39 smoker.

40  
41 The present result suggests that smoking keeps MDA-LDL level elevated for a long time.  
42  
43  
44 Therefore, a method for lowering MDA-LDL level is especially needed for smokers. One  
45  
46  
47 possible candidate might be statin therapy. Statins facilitate the LDL uptake in hepatocytes,  
48  
49  
50 decrease old LDL (which is easily oxidized), and thereby reduce the risk of LDL oxidization <sup>14</sup>.  
51  
52  
53 The decreases in fatty acids and cholesterol in the lipoprotein are also likely to lead to a  
54  
55  
56 decrease in oxidization <sup>15</sup>. In the current study, we examined the effect of statin treatment on  
57  
58  
59  
60

1  
2  
3  
4  
5  
6 MDA-LDL level between non-smokers and smokers. MDA-LDL level was found to be  
7  
8  
9 significantly higher in smokers than in non-smokers in stain (-) group. On the other hand, the  
10  
11  
12 effect of smoking on LDL-C level was not seen in statin (+) group, the level was similar  
13  
14  
15 between smokers and non-smokers. The ratio of MDA-LDL/LDL-C showed a similar result.  
16  
17  
18 These results may suggest that statin therapy would reduce MDA-LDL level in smokers to a  
19  
20  
21 level similar to that in non-smokers.

22  
23  
24 It has been reported that cigarette smoking is one of the risk factors for organic stenosis but that  
25  
26  
27 it does not act alone in contributing to the progression of atherosclerosis<sup>15 16</sup>. In addition  
28  
29  
30 atherosclerosis was not produced by smoking alone in animal models<sup>17</sup>. However, cigarette  
31  
32  
33 smoking acts in concert with other risk factors such as hypercholesterolemia to accelerate  
34  
35  
36 atherosclerosis<sup>15 16 18 19 20</sup>. The current study is in agreement with the previous reports.  
37  
38  
39 Importantly, it has been shown that among other risk factors cigarette smoking alone is a highly  
40  
41  
42 significant risk factor for coronary spasm<sup>21 22 23 24 25</sup> and treatment with fluvastatin reduced the  
43  
44  
45 coronary spasm<sup>26</sup>. Thus, smoking cessation combined with statin therapy would be beneficial  
46  
47  
48 for prevention of ischemic heart disease by reducing progression of atherosclerosis and  
49  
50  
51 suppressing coronary spasm.

52  
53  
54 In the present study, we performed multivariate analysis for determination of MDA-LDL by  
55  
56  
57 using the factors of LDL-C level, age, BMI, HbA1c, Cr, BNP and Brinkman index; however,  
58  
59  
60

1  
2  
3  
4  
5  
6 there may be other factors associated with MDA-LDL in a direct or indirect manner. As a matter  
7  
8  
9 of fact, the previous study by Matsuda et al. showed that MDA-LDL level was correlated with  
10  
11 triglyceride, HDL-C, metformin and  $\alpha$ -glucosidase inhibitors in statin-treated diabetes patients  
12  
13 with CAD<sup>27</sup>. Then, we performed another multivariate analysis. As a result, it revealed that  
14  
15 MDA-LDL level was correlated with LDL-C, triglyceride and smoking, however, not with  
16  
17 HDL-C, anti-hypertensive drugs, anti-diabetes agents such as metformin and  $\alpha$ -glucosidase  
18  
19 inhibitors, number of the vessels with CAD and CRP. (Precise data not shown) Furthermore,  
20  
21 there may be confounding factors among them; and the correlation among each factors were  
22  
23 also investigated. As a result, there were only slight correlation between CAD and HDL-C  
24  
25 (R=-0.163), between CAD and smoking (R=0.098), between triglyceride and HDL-C (R=0.203)  
26  
27 and between triglyceride and smoking (R=-0.163) (Precise data not shown). The reason of the  
28  
29 difference between the previous study and ours may be due to the different study population. In  
30  
31 any case, it would be safe to say that smoking affected MDA-LDL level in a fairly direct  
32  
33 manner.  
34  
35  
36  
37  
38  
39  
40  
41  
42  
43  
44  
45

#### 46 **Conclusion**

47  
48  
49 We found that MDA-LDL level was affected by multiple factors such as smoking status (as  
50  
51 indicated by Brinkman index), LDL-C level and gender. In addition to its other health effects,  
52  
53 smoking should be strongly prohibited due to its harmful effect from a MDA-LDL standpoint.  
54  
55  
56  
57  
58  
59  
60

1  
2  
3  
4  
5  
6 We recommend that patients should never smoke, but that once smoking has started, it is  
7  
8  
9 essential to quit smoking as early as possible and to cut back on the number of cigarettes  
10  
11  
12 consumed. Furthermore, statin therapy might have a beneficial effect on the reduction of  
13  
14  
15 MDA-LDL level.  
16  
17  
18  
19

### 20 **Footnotes**

21  
22  
23 Contributors: Conceived and designed the experiments: KO TT KM MY. Performed the  
24  
25  
26 experiments: KO HS SA TN TO. Performed the statistical analysis: KO HS KM MY.  
27

28  
29 Contributed reagents/materials/analysis tools: KO TT TN KM. Wrote the paper: KO TT KM  
30  
31  
32 MY.  
33  
34  
35  
36  
37

38 Competing interests: None  
39  
40  
41  
42

43 Funding: None  
44  
45  
46  
47  
48

49 Ethics approval: The study protocol (24-150[6916]) was approved by the ethics committee of  
50  
51  
52 the Jikei University School of Medicine.  
53  
54  
55  
56  
57  
58  
59  
60

Provenance and peer review: Not commissioned; externally peer reviewed

Data sharing: No additional data are available.

## References

1. Kotani K, Maekawa M, Kanno T, et al. Distribution of immunoreactive malondialdehyde-modified low-density lipoprotein in human serum. *Biochimica et biophysica acta* 1994;**1215**(1-2):121-5.
2. Kitano S, Kanno T, Maekawa M, et al. Improved method for the immunological detection of malondialdehyde-modified low-density lipoproteins in human serum. *Analytica Chimica Acta* 2004;**509**(2):229-35.
3. Kondo A, Manabe M, Saito K, et al. Insulin treatment prevents LDL from accelerated oxidation in patients with diabetes. *Journal of atherosclerosis and thrombosis* 2002;**9**(6):280-7.
4. Kondo A, Muranaka Y, Ohta I, et al. Relationship between triglyceride concentrations and LDL size evaluated by malondialdehyde-modified LDL. *Clinical chemistry* 2001;**47**(5):893-900.
5. Kondo A, Li J, Manabe M, et al. Relationship between high-density lipoprotein-cholesterol and malondialdehyde-modified low-density lipoprotein concentrations. *Journal of atherosclerosis and thrombosis* 2003;**10**(2):72-8.
6. Tanaga K, Bujo H, Inoue M, et al. Increased circulating malondialdehyde-modified LDL levels in patients with coronary artery diseases and their association with peak sizes of LDL particles. *Arteriosclerosis, thrombosis, and vascular biology* 2002;**22**(4):662-6.
7. Shigematsu S, Takahashi N, Hara M, et al. Increased incidence of coronary in-stent restenosis in type 2 diabetic patients is related to elevated serum malondialdehyde-modified low-density lipoprotein. *Circulation journal : official journal of the Japanese Circulation Society* 2007;**71**(11):1697-702.
8. Tsimikas S, Lau HK, Han KR, et al. Percutaneous coronary intervention results in acute increases in oxidized phospholipids and lipoprotein(a): short-term and long-term immunologic responses to oxidized low-density lipoprotein. *Circulation* 2004;**109**(25):3164-70.
9. Yagi H, Komukai K, Hashimoto K, et al. Difference in risk factors between acute coronary syndrome and stable angina pectoris in the Japanese: smoking as a crucial risk factor of acute coronary syndrome. *Journal of cardiology* 2010;**55**(3):345-53.
10. Sekiyama H, Nagoshi T, Komukai K, et al. Transient decrease in serum potassium level during ischemic attack of acute coronary syndrome: paradoxical contribution of plasma glucose level

- and glycohemoglobin. *Cardiovascular diabetology* 2013;**12**:4.
11. Brinkman GL, Coates EO, Jr. The effect of bronchitis, smoking, and occupation on ventilation. *The American review of respiratory disease* 1963;87:684-93.
  12. Yokode M, Kita T, Arai H, et al. Cholesteryl ester accumulation in macrophages incubated with low density lipoprotein pretreated with cigarette smoke extract. *Proceedings of the National Academy of Sciences of the United States of America* 1988;85(7):2344-8.
  13. Harats D, Ben-Naim M, Dabach Y, et al. Cigarette smoking renders LDL susceptible to peroxidative modification and enhanced metabolism by macrophages. *Atherosclerosis* 1989;79(2-3):245-52.
  14. Gotto AM. Interactions of the major risk factors for coronary heart disease. *The American Journal of Medicine* 1986;80(2):48-55.
  15. Willett WC, Green A, Stampfer MJ, et al. Relative and absolute excess risks of coronary heart disease among women who smoke cigarettes. *The New England journal of medicine* 1987;317(21):1303-9.
  16. Stein Y, Harats D, Stein O. Why is smoking a major risk factor for coronary heart disease in hyperlipidemic subjects? *Annals of the New York Academy of Sciences* 1993;686:66-9; discussion 69-71.
  17. Asano M, Ohkubo C, Hirokawa A, et al. Smoking Research Foundation Annual Research Report, On macro- and microcirculatory effects of tobacco smoke inhalation on atherogenesis in the rabbit. 1987:251-61.
  18. Anderson KM, Wilson PW, Odell PM, et al. An updated coronary risk profile. A statement for health professionals. *Circulation* 1991;83(1):356-62.
  19. Gotto AM, Jr. Interactions of the major risk factors for coronary heart disease. *Am J Med* 1986;80(2a):48-55.
  20. Holbrook JH, Grundy SM, Hennekens CH, et al. Cigarette smoking and cardiovascular diseases. A statement for health professionals by a task force appointed by the steering committee of the American Heart Association. *Circulation* 1984;70(6):1114a-17a.
  21. Caralis DG, Deligonul U, Kern MJ, et al. Smoking is a risk factor for coronary spasm in young women. *Circulation* 1992;85(3):905-9.
  22. Sugiishi M, Takatsu F. Cigarette smoking is a major risk factor for coronary spasm. *Circulation* 1993;87(1):76-9.
  23. Yoshimura M, Yasue H, Nakayama M, et al. A missense Glu298Asp variant in the endothelial nitric oxide synthase gene is associated with coronary spasm in the Japanese. *Human genetics* 1998;103(1):65-9.
  24. Nakayama M, Yasue H, Yoshimura M, et al. T-786-->C mutation in the 5'-flanking region of the endothelial nitric oxide synthase gene is associated with coronary spasm. *Circulation* 1999;99(22):2864-70.



- 1  
2  
3  
4  
5  
6  
7  
8  
9  
10  
11  
12  
13  
14  
15  
16  
17  
18  
19  
20  
21  
22  
23  
24  
25  
26  
27  
28  
29  
30  
31  
32  
33  
34  
35  
36  
37  
38  
39  
40  
41  
42  
43  
44  
45  
46  
47  
48  
49  
50  
51  
52  
53  
54  
55  
56  
57  
58  
59  
60
25. Takaoka K, Yoshimura M, Ogawa H, et al. Comparison of the risk factors for coronary artery spasm with those for organic stenosis in a Japanese population: role of cigarette smoking. *International journal of cardiology* 2000;72(2):121-6.
26. Yasue H, Mizuno Y, Harada E, et al. Effects of a 3-hydroxy-3-methylglutaryl coenzyme A reductase inhibitor, fluvastatin, on coronary spasm after withdrawal of calcium-channel blockers. *Journal of the American College of Cardiology* 2008;51(18):1742-8.
27. Matsuda M, Tamura R, Kanno K, et al. Impact of dyslipidemic components of metabolic syndrome, adiponectin levels, and anti-diabetes medications on malondialdehyde-modified low-density lipoprotein levels in statin-treated diabetes patients with coronary artery disease. *Diabetology & metabolic syndrome* 2013;5(1):77.

## Figure legends

*Fig. 1 Correlations of MDA-LDL level with various clinical factors*

The clinical factors affecting MDA-LDL level are shown in (A)-(H).

*Fig. 2 Correlation of smoking status with MDA-LDL and LDL-cholesterol levels*

Correlation between MDA-LDL level and Brinkman index (A) and, between LDL-C level and Brinkman index (B) was determined with a linear regression analysis. Kruskal Wallis test was performed to evaluate the difference of MDA-LDL (C) and LDL-C (D) among 4 groups divided by Brinkman index. Comparison of MDA-LDL levels among non-smokers, ex-smokers and current smokers (E). Comparison of MDA-LDL levels in each patient group among non-smokers and ex-smokers who had quit more than 21 years earlier, ex-smokers who had quit 11 to 20 years ago, ex-smokers who had quit less than 10 years ago and current smokers (F).

*Fig. 3 Effects of the statin therapy on the correlations of smoking status with MDA-LDL or LDL-cholesterol level*

The correlations of the smoking status with MDA-LDL and LDL-C levels were investigated after dividing the patients into two groups; with (A) or without (B) statin treatment.

1  
2  
3  
4  
5  
6  
7  
8  
9 **Increase in the Oxidized Low-Density Lipoprotein Level by Smoking and the Possible**

10  
11 **Inhibitory Effect of Statin Therapy in Patients with Cardiovascular Disease.**

12  
13  
14  
15  
16 Kazuo Ogawa, MD. ; Toshikazu Tanaka, MD. PhD. ; Tomohisa Nagoshi, MD. PhD.;

17  
18 Hiroshi Sekiyama, MD. PhD. ; Satoshi Arase, MD. ; Kosuke Minai, MD. PhD. ;

19  
20  
21 Takayuki Ogawa, MD. PhD and Michihiro Yoshimura, MD. PhD.

22  
23  
24 Division of Cardiology, Department of Internal Medicine,

25  
26  
27 The Jikei University School of Medicine, Tokyo, Japan

28  
29  
30  
31  
32 All correspondence should get to Kazuo Ogawa, MD  
33 Division of Cardiology, Department of Internal Medicine  
34 The Jikei University School of Medicine  
35 3-25-8, Nishi-Shinbashi, Minato-ku  
36 Tokyo, Japan 105-8461  
37 Telephone: +81-3-3433-1111  
38 FAX: +81-3-3433-3459  
39 E-mail: [oga-n@jikei.ac.jp](mailto:oga-n@jikei.ac.jp)

40  
41  
42 This author takes responsibility for all aspects of the reliability and freedom from bias of the  
43 data presented and their discussed interpretation

44  
45  
46  
47 | **Keywords:** MDA-LDL; **s**Smoking; **o**Oxidative stress; **c**Coronary artery disease; **s**Statin therapy

48  
49  
50 | **Word count:** [27692650](#)

**Abstract**

## Objectives:

MDA-LDL level is a marker of oxidative stress and is linked to progression of arteriosclerosis; however, the clinical factors affecting the oxidized LDL level have not been elucidated. We herein investigated various factors to identify correlation with MDA-LDL level in high risk patients requiring catheter intervention.

## Setting:

Secondary care (cardiology), single center study

## Participants:

600 patients who were admitted to our hospital and underwent cardiac catheterization

## Primary and secondary outcome measures:

Blood samples were obtained to measure lipid profiles and MDA-LDL level.

## Results:

With regard to smoking status, MDA-LDL level was significantly higher in ex-/current smokers compared with non-smokers. Of note, there was no improvement of MDA-LDL level even in patients who quitted smoking. Multiple regression analysis showed that MDA-LDL level was positively correlated with LDL-cholesterol level, Brinkman index and male gender. The correlation between smoking status and either MDA-LDL or LDL-C level was investigated in

1  
2  
3  
4  
5  
6  
7  
8  
9 two groups; namely, patients, with or without statin treatment. In non-statin group, MDA-LDL  
10  
11 level and MDA-LDL/LDL-C ratio were significantly higher in ex-/current smokers compared  
12  
13 with non-smoker, while no significant correlation was observed between smoking status and  
14  
15 LDL-C level. In contrast, in statin group, there were no significant correlations between  
16  
17 smoking status and all any of these cholesterol parameters.  
18  
19

20  
21  
22 Conclusions:

23  
24 We found that MDA-LDL level was affected by multiple factors, such as smoking status,  
25  
26 LDL-C level and male gender. The present findings give additional evidence that smoking  
27  
28 should be prohibited from MDA-LDL standpoint. Furthermore, statin therapy might have a  
29  
30 beneficial effect on the reduction of MDA-LDL level.  
31  
32

33  
34 Trial registration:

35  
36  
37 N/A  
38

39  
40  
41 **Main strengths**

42  
43 Although oxidative LDL is associated with the marker of oxidative stress and the progression of  
44  
45 atherosclerosis, clinical factor which affects the oxidative LDL remains uncertain. Our study  
46  
47 revealed that MDA-LDL was associated with smoking and ~~the~~ MDA-LDL level would never  
48  
49 decrease with smoking cessation. However, MDA-LDL level was decreasing even in smokers  
50  
51 with statin therapy.  
52  
53  
54

Formatted: Font: Not Bold

Formatted: Font: Times New Roman, 11 pt

### Study limitations

Smoking cessation was not found to be effective for reducing MDA-LDL level in this study; however, favorable effects of smoking cessation would likely occur with regard to other parameters than MDA-LDL level. Thus smoking cessation is recommended at any time, even after long-term smoking, and is considered to provide cardiovascular health benefits.

This was a retrospective study, and the true effects of  $\alpha$ -statin on MDA-LDL level remains uncertain. Finally, we did not examine the prognosis of the study population and therefore, the effects of smoking cessation and/or statin therapy remains uncertain, especially in terms of their impact on MDA-LDL level. Prospective studies should be required to obtain answers regarding their topics.

## Introduction

The malondialdehyde modified low-density lipoprotein (MDA-LDL; oxidized LDL) is LDL that has been modified by MDA, leading to the production of a large amount of aldehyde when LDL becomes degenerated and oxidized<sup>1</sup>.

It is known that MDA-LDL level is elevated in patients with dyslipidemia and diabetes mellitus (DM), both risks factors for atherosclerotic disease<sup>2,3</sup>. Since MDA-LDL level has a positive correlation with the serum LDL level, the ratio of MDA-LDL/LDL-C (M/L) is used to evaluate the severity of oxidization of LDL; in some reports, not only MDA-LDL level, but also M/L ratio has been shown to increase in patients with DM compared with controls<sup>4,5</sup>.

In patients with coronary artery disease (CAD), MDA-LDL level and M/L ratio have been shown to increase even when there are no other differences in the other lipid profiles<sup>6</sup>. In addition, it has been shown that the measurement of MDA-LDL level might be useful as a predictor of restenosis after percutaneous coronary intervention in patients with DM<sup>7</sup>. Based on these findings, it has been speculated that MDA-LDL level might be important marker of the progression of arteriosclerosis; however, the clinical factors possibly affecting MDA-LDL level have not been elucidated. Therefore, in the present study, we investigated “the clinical factors” affecting MDA-LDL level in high risk patients requiring catheter intervention.

## Methods

### *Study patients*

The study protocol (24-150[6916]) was approved by the ethics committee of the Jikei University School of Medicine. Six hundred consecutive patients who underwent cardiac catheterization from March 2010 to September 2011 were examined in this study. The baseline patient characteristics, including the clinical parameters and the biochemical data, were collected retrospectively from the hospital medical records. In addition, the results of the catheterization (i.e. the number of occluded or narrowed vessels), body weight, body mass index (BMI), coronary risk factors and medication profiles were also investigated. The patients taking eicosapentaenoic acid (EPA) were excluded since it has been demonstrated that EPA is major [lipid-loweringantihyperlipidemic](#) agents with potent antioxidant effects.

### *Data collection*

Blood sampling was performed to examine the serum MDA-LDL, serum creatinine, hemoglobin A1c (HbA1c), B-type (brain) natriuretic peptide (BNP) and low-density lipoprotein cholesterol (LDL-C) levels. [The previous study reported by Tismikas et al.<sup>8</sup> encompassed that PCI would affect the oxidative LDL level. To avoid the modification of LDL level by PCI, we tried to take a blood draw immediately before the cardiac catheterization or at the outpatient](#)



1  
2  
3  
4  
5  
6  
7  
8  
9 [clinic before admission](#). MDA-LDL level was measured by an ELISA using an anti-MDA-LDL  
10  
11 monoclonal antibody (ML25) and  $\beta$ -galactosidase anti-apoB monoclonal antibody (AB16)<sup>1</sup>.<sup>–</sup>It  
12  
13 is well known that the combination of ML25 and AB16 can accurately detect MDA-LDL<sup>1</sup>.  
14

15  
16 The concentration of MDA-LDL is defined at 1 mg/L of MDA-LDL produced artificially, which  
17  
18 shows the same signal as 1U/L of MDA-LDL in the serum. [Serum levels of LDL cholesterol](#)  
19  
20  
21 [were determined enzymatically. \(Sekisui Medical Co., Ltd., Tokyo, Japan\)](#)  
22  
23

24 Diabetes mellitus (DM), hypertension, dyslipidemia and smoking were defined as described  
25  
26 previously<sup>9 10</sup>. [Dyslipidemia was diagnosed with the use of lipid-lowering agents, the](#)  
27  
28 [presence of 1 or more of the following 3 lipid disorders at first fasting blood sampling or](#)  
29  
30 [both: a low-density lipoprotein \(LDL\) cholesterol level  \$\geq\$ 140 mg/dL, a triglyceride level](#)  
31  
32  [\$\geq\$ 150 mg/dL, and a high-density lipoprotein \(HDL\) cholesterol level  \$<\$ 40 mg/dL<sup>9</sup>. Blood](#)  
33  
34 [sampling was performed on the day of the catheter examination, except for the case that has](#)  
35  
36 [already been performed at outpatient clinic. Among 600 patients, 342 were performed on the](#)  
37  
38 [day of the catheter examination, and remaining 258 were at outpatient.](#)  
39  
40  
41  
42  
43  
44

45 The definition of smoking status ~~was~~ as follows: current smokers were those who were  
46  
47 smoking at the time of the study or who had smoked in the past year; the subjects who had quit  
48  
49 smoking more than one year before the study were defined as ex-smokers and those who had  
50  
51 never smoked were defined as non-smokers. Brinkman Index was used to evaluate the smoking  
52  
53  
54

1  
2  
3  
4  
5  
6  
7  
8  
9 status of current/ex-smokers <sup>11</sup>.

10  
11  
12  
13  
14 *Statistical analysis*

15  
16 Comparisons between MDA-LDL level and LDL-C level, age, BMI, HbA1c, Cr, BNP and  
17  
18 Brinkman index were performed with a linear regression analysis. Comparison between  
19  
20 Brinkman index and LDL-C was also performed with a linear regression analysis. Comparisons  
21  
22 of MDA-LDL levels between males and females, subjects with or without hypertension,  
23  
24 non-smokers versus ex-smokers versus current smokers, and among the various patient groups  
25  
26 after smoking cessation were performed with Mann-Whitney U test. [Kruskal Wallis test was](#)  
27  
28 [performed to evaluate the difference of MDA-LDL \(C\) and LDL-C \(D\) among 4 groups divided](#)  
29  
30 [by Brinkman index.](#) Multiple factors, which were considered to possibly modify MDA-LDL  
31  
32 levels were evaluated with a stepwise multiple regression analysis. Comparisons of LDL-C and  
33  
34 MDA-LDL level and M/L ratio between non-smokers and smokers were performed with  
35  
36 Mann-Whitney U test.

37  
38  
39  
40  
41  
42  
43  
44  
45 [A value of p <0.05 was considered to be statistically significant for all data that were](#)  
46  
47 [statistically analyzed using the SPSS software package, version 21.0 \(SPSS Inc., Chicago,](#)  
48  
49 [IL\). Statistical significance was defined as a value of p <0.05.](#)  
50  
51

## Results

### *Baseline characteristics*

The baseline characteristics of the patients in this study ~~were~~ shown in Table 1. The average age was  $64.8 \pm 11.4$  years old and 80.3% of them were male. The percentages of non-smokers, ex-smokers and current smokers were 32%, 42% and 26%, respectively. The average LDL-C level and MDA-LDL level ~~were~~  $106.1 \pm 30.8$  mg/dl and  $119.2 \pm 48.7$  U/L, respectively. The percentage of patients taking statin therapy was 55.3%. In addition, patient characteristics divided by smoking status into 3 groups (non-smokers, ex-smokers, current smokers) were shown in Table 1-3.

Table 1-1 Patient's Characteristics

|                                 | <b>N</b> <b>n</b> <b>%</b> | <b>mean</b> <b>±</b> <b>SD</b> |
|---------------------------------|----------------------------|--------------------------------|
| Age, years                      |                            | 64.8 $\pm$ 11.4                |
| Male, gender (%)                |                            | 80.3                           |
| Height, cm                      |                            | 165.4 $\pm$ 25.1               |
| Weight, kg                      |                            | 66.8 $\pm$ 13.3                |
| BMI, kg/m <sup>2</sup>          |                            | 24.4 $\pm$ 3.74                |
| Non-smoker, N n (%)             | 192 (32.4)                 |                                |
| Ex-smoker, N n (%)              | 247 (41.7)                 |                                |
| Current smoker, N n (%)         | 153 (25.8)                 |                                |
| Cr, mg/dL                       |                            | 1.38 $\pm$ 1.94                |
| eGFR, mL/min/1.73m <sup>2</sup> |                            | 62.6 $\pm$ 21.6                |
| HbA1c, %                        |                            | 6.4 $\pm$ 1.1                  |
| BNP, pg/mL                      |                            | 140 $\pm$ 263                  |
| LDL-C, mg/dL                    |                            | 106.1 $\pm$ 30.8               |
| MDA-LDL, U/L                    |                            | 119.2 $\pm$ 48.7               |
| M/L                             |                            | 1.16 $\pm$ 0.47                |

BMI: body mass index Cr: creatinine, eGFR: estimated glomerular filtration rate, BNP: B-type natriuretic peptide, LDL-C: low-density lipoprotein cholesterol, MDA-LDL: Malondialdehyde modified low density lipoprotein, M/L: Malondialdehyde modified low density lipoprotein/ low density lipoprotein cholesterol;

Table 1-2 Patient's Characteristics

| Disease                 | N,n(%)     |
|-------------------------|------------|
| Diabetes Mellitus       | 252_(42.0) |
| Hypertension            | 455_(75.5) |
| Dyslipidemia            | 441_(73.5) |
| Medicine                | N,n(%)     |
| Sstatin                 | 332_(55.3) |
| Ezetimibe               | 31_(5.2)   |
| Fibrate                 | 13_(2.1)   |
| Coronary Artery Disease | N,n(%)     |
| 0VD                     | 215_(35.8) |
| 1VD                     | 249_(41.5) |
| 2VD                     | 84_(14.0)  |
| 3VD                     | 52_(8.7)   |

0VD: 0-vessel disease, 1VD: single-vessel disease, 2VD: double-vessel disease, 3VD: triple-vessel disease

Table 1-3 Patient's characteristics divided by smoking status

|                        | Non-smoker  | Ex-smoker    | Current smoker |
|------------------------|-------------|--------------|----------------|
| Number of patients (%) | 192 (32.4)  | 250 (42.2)   | 151 (25.4)     |
| Age                    | 66.9 ± 12.4 | 65.5 ± 9.5   | 60.9 ± 12.2    |
| Male, gender (%)       | 110 (57.3)  | 228 (91.2) * | 138 (91.4)     |

|                                |                      |                      |                       |
|--------------------------------|----------------------|----------------------|-----------------------|
| <u>Height, cm</u>              | <u>160.3 ± 11.0</u>  | <u>166.0 ± 11.8*</u> | <u>167.4 ± 7.3</u>    |
| <u>Weight, kg</u>              | <u>62.7 ± 14.0</u>   | <u>67.7 ± 10.9*</u>  | <u>70.6 ± 14.8</u>    |
| <u>BMI, kg/m<sup>2</sup></u>   | <u>24.2 ± 3.6</u>    | <u>24.3 ± 3.0</u>    | <u>25.0 ± 4.9</u>     |
| <u>Cr, mg/dL</u>               | <u>1.2 ± 1.5</u>     | <u>1.6 ± 2.1</u>     | <u>1.3 ± 2.1</u>      |
| <u>HbA1c, %</u>                | <u>6.3 ± 0.9</u>     | <u>6.4 ± 1.1</u>     | <u>6.4 ± 1.1</u>      |
| <u>BNP, pg/mL</u>              | <u>167.1 ± 302.0</u> | <u>133.2 ± 264.8</u> | <u>120.7 ± 201.1</u>  |
| <u>LDL-C, mg/dL</u>            | <u>102.3 ± 29.1</u>  | <u>104.2 ± 28.4</u>  | <u>114.8 ± 35.2**</u> |
| <u>MDA-LDL, U/L</u>            | <u>108.0 ± 43.6</u>  | <u>122.1 ± 49.2*</u> | <u>129.3 ± 52.1</u>   |
| <u>M/L</u>                     | <u>2.06 ± 0.85</u>   | <u>2.26 ± 0.82</u>   | <u>2.6 ± 0.99</u>     |
| <u>LVEF, %</u>                 | <u>60.2 ± 10.0</u>   | <u>56.7 ± 9.6*</u>   | <u>54.4 ± 12.1</u>    |
| <u>Diabetes Mellitus</u>       | <u>72 (37.5)</u>     | <u>112 (44.8)</u>    | <u>65 (43.0) *</u>    |
| <u>Hypertension</u>            | <u>155 (80.7)</u>    | <u>191 (76.4)</u>    | <u>104 (68.9) *</u>   |
| <u>Dyslipidemia</u>            | <u>134 (69.8)</u>    | <u>185 (74.0)</u>    | <u>116 (76.8)</u>     |
| <u>Statin</u>                  | <u>111 (57.8)</u>    | <u>146 (58.4)</u>    | <u>73 (48.3)</u>      |
| <u>Ezetimibe</u>               | <u>10 (3.6)</u>      | <u>14 (5.6)</u>      | <u>7 (4.6)</u>        |
| <u>Fibrate</u>                 | <u>2 (1.0)</u>       | <u>6 (2.4)</u>       | <u>5 (3.3)</u>        |
| <u>Coronary Artery Disease</u> |                      |                      |                       |
| <u>0VD</u>                     | <u>82 (42.7)</u>     | <u>83 (33.2)</u>     | <u>49 (32.5)</u>      |
| <u>1VD</u>                     | <u>69(35.9)</u>      | <u>105(42.0)</u>     | <u>71(47.0) *</u>     |
| <u>2VD</u>                     | <u>26 (13.5)</u>     | <u>34 (13.6)</u>     | <u>22 (14.6)</u>      |
| <u>3VD</u>                     | <u>15 (7.8)</u>      | <u>28 (7.2)</u>      | <u>9 (6.0)</u>        |
| <b>—</b>                       | <b>Non-smoker</b>    | <b>Ex-smoker</b>     | <b>Current smoker</b> |
| <b>Number of</b>               |                      |                      |                       |
| <b>patients (%)</b>            | <b>192 (32.4)</b>    | <b>250 (42.2)</b>    | <b>151 (25.4)</b>     |

|                        |               |               |                |
|------------------------|---------------|---------------|----------------|
| Age                    | 66.9 ± 12.4   | 65.5 ± 9.5    | 60.9 ± 12.2    |
| Male, gender (%)       | 110 (57.3)    | 228 (91.2)*   | 138 (91.4)     |
| Height, cm             | 160.3 ± 11.0  | 166.0 ± 11.8* | 167.4 ± 7.3    |
| Weight, kg             | 62.7 ± 14.0   | 67.7 ± 10.9*  | 70.6 ± 14.8    |
| BMI, kg/m <sup>2</sup> | 24.2 ± 3.6    | 24.3 ± 3.0    | 25.0 ± 4.9     |
| Cr, mg/dL              | 1.2 ± 1.5     | 1.6 ± 2.1     | 1.3 ± 2.1      |
| HbA1c, %               | 6.3 ± 0.9     | 6.4 ± 1.1     | 6.4 ± 1.1      |
| BNP, pg/mL             | 167.1 ± 302.0 | 133.2 ± 264.8 | 120.7 ± 201.1  |
| LDL-C, mg/dL           | 102.3 ± 29.1  | 104.2 ± 28.4  | 114.8 ± 35.2** |
| MDA-LDL, U/L           | 108.0 ± 43.6  | 122.1 ± 49.2* | 129.3 ± 52.1   |
| M/L                    | 2.06 ± 0.85   | 2.26 ± 0.82   | 2.6 ± 0.99     |
| LVEF, %                | 60.2 ± 10.0   | 56.7 ± 9.6*   | 54.4 ± 12.1    |
| Diabetes Mellitus      | 72 (37.5)     | 112 (44.8)    | 65 (43.0)*     |
| Hypertension           | 155 (80.7)    | 191 (76.4)    | 104 (68.9)*    |
| Dyslipidemia           | 134 (69.8)    | 185 (74.0)    | 116 (76.8)     |
| Statin                 | 111 (57.8)    | 146 (58.4)    | 73 (48.3)      |
| Ezetimibe              | 10 (3.6)      | 14 (5.6)      | 7 (4.6)        |
| Fibrate                | 2 (1.0)       | 6 (2.4)       | 5 (3.3)        |

~~Coronary Artery~~~~Disease~~

|                |                      |                       |                        |
|----------------|----------------------|-----------------------|------------------------|
| <del>0VD</del> | <del>82 (42.7)</del> | <del>83 (33.2)</del>  | <del>49 (32.5)</del>   |
| <del>1VD</del> | <del>69 (35.9)</del> | <del>105 (42.0)</del> | <del>71 (47.0) *</del> |
| <del>2VD</del> | <del>26 (13.5)</del> | <del>34 (42.0)</del>  | <del>22 (14.6)</del>   |
| <del>3VD</del> | <del>15 (7.8)</del>  | <del>28 (7.2)</del>   | <del>9 (6.0)</del>     |

~~\*: P <0.05 vs. Non-smoker, \*\*: P <0.05 vs. Ex-smoker~~

#### *Clinical factors affecting MDA-LDL level*

To elucidate the determinants of MDA-LDL level, ~~we first performed~~ a simple regression analysis ~~was performed~~. (Fig. 1). MDA-LDL level showed a significantly positive correlation with LDL-C level (Fig. 1A) and a negative correlation with age (Fig. 1B). In addition, MDA-LDL levels ~~was~~ were significantly higher in males as well as ~~the~~ patients without hypertension (Figs. 1C, D). BMI, HbA1c, Cr and BNP level had no impact on MDA-LDL level (Figs. 1E-H).

#### *Correlation of smoking status with MDA-LDL level*



1  
2  
3  
4  
5  
6  
7  
8  
9 ~~N~~We next, ~~examined~~ the impact of smoking status on MDA-LDL level was performed.  
10  
11 MDA-LDL, but not LDL-C, showed a significantly positive correlation with the smoking  
12  
13 profiles indicated by Brinkman index (*Fig. 2-1-A, B*). However, considering the bias of the  
14 Brinkman distribution, in addition to Fig. 2-1-A, B, MDA-LDL level and LDL-C level were  
15 analyzed with dividing by Brinkman index into 4 groups. There was a significant difference of  
16 MDA-LDL level between non-smoker and current-smoker, whereas there was no significant  
17 difference of LDL-C regardless of the smoking status (*Fig. 2-1C, D*).

Formatted: Font: Italic

Formatted: Font: Italic

26  
27 The patients were subsequently divided into three groups according to their smoking status:  
28  
29 Non-, ex- and current smokers. MDA-LDL level was significantly higher in both ex- and  
30  
31 current smokers compared to that in non-smokers (*Fig. 2-C2-E*). Moreover, when patients were  
32  
33 compared based on the number of years after smoking cessation, not only ~~the~~ current smoking  
34  
35 group, but also ~~the~~ group that had quit smoking within 10 years and that where the patients had  
36  
37 quit smoking more than 21 years earlier showed higher MDA-LDL levels than ~~did the~~  
38  
39 non-smoking group (*Fig. 2-2-FD*).

44 ~~This suggests that MDA-LDL level will never completely recover once a subject has started~~  
45 ~~smoking~~.

Formatted: Font: Italic, Not Strikethrough

52 *Clinical factors affecting MDA-LDL level identified in multiple regression analysis*

To assess the independent determinants of MDA-LDL level, a multiple regression analysis was performed. After removing the confounding factors, MDA-LDL level was shown to be positively correlated with LDL-C level ( $p < 0.001$ ), Brinkman index ( $p = 0.009$ ) and a male gender ( $p = 0.019$ ) (Table 2).

**Table 2 Multiple Regression Analysis**

| Significant variable | Regression coefficients | Standard error | Standard regression coefficients | F       | p      |
|----------------------|-------------------------|----------------|----------------------------------|---------|--------|
| LDL-C                | 0.675                   | 0.06           | 0.429                            | 128.089 | <0.001 |
| Brinkman index       | 0.008                   | 0.003          | 0.105                            | 71.502  | 0.009  |
| Gender               | 11.511                  | 4.908          | 0.94                             | 49.901  | 0.019  |

Objective variable: MDA-LDL

Explanatory variable: BMI, Age, Gender, brinkman index, Cr, BNP, LDL-C, HbA1c, HT

No significant variables: BMI, Age, Cr, BNP, HbA1c, HT

*Effects of statin therapy on the correlations of smoking status with MDA-LDL or LDL-cholesterol level*

The correlations of ~~the~~ smoking status with MDA-LDL/LDL-C level ~~was~~ ~~ere~~ investigated after patients were divided into two groups; those with or without statin treatment (*Fig.-3*). In non-statin-treated group, MDA-LDL level as well as MDA-LDL/LDL-C ratio, was significantly increased in ex-/current smokers compared to those in non-smokers, although there was no

1  
2  
3  
4  
5  
6  
7  
8  
9 | significant differences in LDL-C levels between the subjects with the different smoking status.

10  
11 | LDL-C level was not significantly different in non-statin-treated and statin-treated groups.

## 16 17 **Discussion**

18  
19 | In this study, we investigated the factors associated with MDA-LDL level in high risk patients  
20  
21 | requiring cardiac catheterization. According to a multivariate analysis, Brinkman index, as well  
22  
23 | as the LDL-C level and gender were found to be significantly associated with MDA-LDL level.

24  
25 | Furthermore, we found that smoking cessation was not effective for reducing MDA-LDL level,  
26  
27 | even after the patients had quit smoking for many years. – However, we found evidence that  
28  
29 | statin treatment may reduce MDA-LDL level, which could possibly help in the treatment of  
30  
31 | smokers.

32  
33 | It has been reported that smoking may affect susceptibility of plasma LDL to peroxidative  
34  
35 | modification. Modified LDL has been shown to be the preferred substrate for macrophages and  
36  
37 | induces their subsequent transformation into foam cells<sup>12 13</sup>. Thus, oxidative stress is very  
38  
39 | important for synthesis of modified-LDL. However, it is noteworthy that MDA-LDL level was  
40  
41 | emphatically influenced by smoking but not by obesity (estimated by BMI), hypertension,  
42  
43 | diabetes mellitus (estimated by HbA1c level), renal failure (estimated by Cr level) or heart  
44  
45 | failure (estimated by BNP level) by the multivariate analysis in this study, though all of these  
46  
47  
48  
49  
50  
51  
52  
53  
54

1  
2  
3  
4  
5  
6  
7  
8  
9 clinical characteristics have been shown to increase oxidative stress. The precise mechanisms by  
10 which smoking increases MDA-LDL level remains unclear at present.

11  
12  
13  
14 The current study clearly showed that smoking was substantially harmful with regard to  
15 increasing MDA-LDL level. When we examined the effect of smoking status on MDA-LDL  
16 level among ~~the~~ non-smokers, ex-smokers and current smokers, we found that MDA-LDL level  
17 was still higher in ~~the~~ ex-smokers than in ~~the~~ non-smokers and was unexpectedly similar to the  
18 level in ~~the~~ current smokers. Furthermore, we examined the effects of the period of smoking  
19 cessation and the analysis indicated that even many years after smoking cessation, there was no  
20 significant reduction of MDA-LDL level. This result suggests that smoking should never be  
21 started, and that if started, it is important to quit smoking as soon as possible before becoming a  
22 heavy smokers.  
23  
24  
25  
26  
27  
28  
29  
30  
31  
32  
33  
34  
35  
36

37 The present results suggests that smoking keeps MDA-LDL level elevated for a long time.  
38  
39 Therefore, a method for lowering MDA-LDL level is especially needed for smokers. One  
40 possible candidate ~~might~~would be statin therapy. Statins facilitate the LDL uptake in  
41 hepatocytes, decrease old LDL (which ~~is~~ easily oxidized), and thereby reduce the risk of LDL  
42 oxidization<sup>14</sup>. The decreases in fatty acids and cholesterol in the lipoprotein are also likely to  
43 lead to a decrease in oxidization<sup>15</sup>. In the current study, we examined the effects of statin  
44 treatment on MDA-LDL levels between non-smokers and smokers. MDA-LDL level was found  
45  
46  
47  
48  
49  
50  
51  
52  
53  
54

1  
2  
3  
4  
5  
6  
7  
8  
9 to be significantly higher in smokers than in non-smokers in the stain (-) group. On the other  
10  
11 hand, the effect of smoking on LDL-C level was not seen in the statin (+) group, the levels  
12  
13 ~~wasere~~ similar between smokers and non-smokers. The ratio of MDA-LDL/LDL-C showed a  
14  
15 similar result. These results may suggest that statin therapy ~~wouldcan~~ reduces MDA-LDL level  
16  
17  
18 in smokers to a level similar to that in non-smokers.

19  
20  
21 It has been reported that cigarette smoking is one of the risk factors for organic stenosis but that  
22  
23 it does not act alone in contributing to the progression of atherosclerosis <sup>15 16</sup>. In addition,  
24  
25  
26 atherosclerosis was not produced by smoking alone in animal models <sup>17</sup>. However, cigarette  
27  
28 smoking acts in concert with other risk factors such as hypercholesterolemia to accelerate  
29  
30 atherosclerosis<sup>15 16 18 19 20</sup>. The current study is in agreement with the previous reports.  
31  
32  
33 Importantly, it has been shown that among other risk factors cigarette smoking alone is a highly  
34  
35 significant risk factor for coronary spasm <sup>21 22 23 24 25</sup> and treatment with fluvastatin reduced the  
36  
37 coronary spasm <sup>26</sup>. Thus, smoking cessation combined with statin therapy would be beneficial  
38  
39  
40 for prevention of ischemic heart disease by reducing progression of atherosclerosis and  
41  
42  
43 suppressing coronary spasm.  
44  
45

46  
47 In the present study, we performed multivariate analysis for determination of MDA-LDL by  
48  
49 using the factors of LDL-C level, age, BMI, HbA1c, Cr, BNP and Brinkman index; however,  
50  
51 there may be other factors associated with MDA-LDL in a direct or indirect manner. As a matter  
52  
53  
54

1  
2  
3  
4  
5  
6  
7  
8  
9 of fact, the previous study by Matsuda et al. showed that MDA-LDL level was correlated with  
10 triglyceride, HDL-C, metformin and  $\alpha$ -glucosidase inhibitors in statin-treated diabetes patients  
11 with CAD<sup>27</sup>.

12  
13  
14  
15  
16 Then, we performed another multivariate analysis. As a result, it revealed that MDA-LDL level  
17 was correlated with LDL-C, triglyceride and smoking, however, not with HDL-C,  
18 anti-hypertensive drugs, anti-diabetes agents such as metformin and  $\alpha$ -glucosidase inhibitors,  
19 number of the vessels with CAD and CRP. (Precise data not shown) Furthermore, there may be  
20 confounding factors among them; and the correlation among each factors were also investigated.  
21  
22 As a result, there were only slight correlation between CAD and HDL-C ( $R=-0.163$ ), between  
23 CAD and smoking ( $R=0.098$ ), between triglyceride and HDL-C ( $R=0.203$ ) and between  
24 triglyceride and smoking ( $R=-0.163$ ) (Precise data not shown). The reason of the difference  
25 between the previous study and ours may be due to the different study population. In any case, it  
26 would be safe to say that smoking affected MDA-LDL level in a fairly direct manner.  
27  
28  
29  
30  
31  
32  
33  
34  
35  
36  
37  
38  
39  
40  
41  
42  
43  
44

#### 45 **Conclusion**

46  
47 We found that MDA-LDL level was affected by multiple factors such as smoking status (as  
48 indicated by Brinkman index), LDL-C level and gender. In addition to its other health effects,  
49 smoking should be strongly prohibited due to its harmful effects from a MDA-LDL standpoint.  
50  
51  
52  
53  
54

1  
2  
3  
4  
5  
6  
7  
8  
9 We recommend that patients should never smoke, but that once smoking has started, it is  
10  
11 essential to quit smoking as early as possible and to cut back on the number of cigarettes  
12  
13 consumed. Furthermore, statin therapy might have a beneficial effect on the reduction of  
14  
15 MDA-LDL level.  
16  
17  
18  
19  
20  
21

## 22 Footnotes

23  
24 Contributors: Conceived and designed the experiments: KO TT KM MY. Performed the

25  
26 experiments: KO HS SA TN TO. Performed the statistical analysis: KO HS KM MY.

27  
28 Contributed reagents/materials/analysis tools: KO TT TN KM. Wrote the paper: KO TT KM

29  
30  
31 MY.

32  
33  
34  
35 -

36  
37  
38 -

39  
40 Competing interests: None

41  
42  
43 -

44  
45 Funding: None

46  
47  
48 -

49  
50 Ethics approval: The study protocol (24-150[6916]) was approved by the ethics committee of  
51  
52 the Jikei University School of Medicine.  
53  
54

[Provenance and peer review: Not commissioned; externally peer reviewed](#)

[Data sharing: No additional data are available.](#)

## References

1. Kotani K, Maekawa M, Kanno T, et al. Distribution of immunoreactive malondialdehyde-modified low-density lipoprotein in human serum. *Biochimica et biophysica acta* 1994;1215(1-2):121-5.
2. Kitano S, Kanno T, Maekawa M, et al. Improved method for the immunological detection of malondialdehyde-modified low-density lipoproteins in human serum. *Analytica Chimica Acta* 2004;509(2):229-35.
3. Kondo A, Manabe M, Saito K, et al. Insulin treatment prevents LDL from accelerated oxidation in patients with diabetes. *Journal of atherosclerosis and thrombosis* 2002;9(6):280-7.
4. Kondo A, Muranaka Y, Ohta I, et al. Relationship between triglyceride concentrations and LDL size evaluated by malondialdehyde-modified LDL. *Clinical chemistry* 2001;47(5):893-900.
5. Kondo A, Li J, Manabe M, et al. Relationship between high-density lipoprotein-cholesterol and malondialdehyde-modified low-density lipoprotein concentrations. *Journal of atherosclerosis and thrombosis* 2003;10(2):72-8.
6. Tanaga K, Bujo H, Inoue M, et al. Increased circulating malondialdehyde-modified LDL levels in patients with coronary artery diseases and their association with peak sizes of LDL particles. *Arteriosclerosis, thrombosis, and vascular biology* 2002;22(4):662-6.
7. Shigematsu S, Takahashi N, Hara M, et al. Increased incidence of coronary in-stent restenosis in type 2 diabetic patients is related to elevated serum malondialdehyde-modified low-density lipoprotein. *Circulation journal : official journal of the Japanese Circulation Society* 2007;71(11):1697-702.
8. Tsimikas S, Lau HK, Han KR, et al. Percutaneous coronary intervention results in acute increases in oxidized phospholipids and lipoprotein(a): short-term and long-term immunologic responses to oxidized low-density lipoprotein. *Circulation* 2004;109(25):3164-70.
9. Yagi H, Komukai K, Hashimoto K, et al. Difference in risk factors between acute coronary syndrome

Formatted: Font: Times New Roman

Formatted: Font: Times New Roman, Not Bold

Formatted: Font: Times New Roman

Formatted: Font: Times New Roman, Not Bold

Formatted: Font: Times New Roman

Formatted: Font: Times New Roman, Not Bold

Formatted: Font: Times New Roman

Formatted: Font: Times New Roman, Not Bold

Formatted: Font: Times New Roman

Formatted: Font: Times New Roman, Not Bold

Formatted: Font: Times New Roman

Formatted: Font: Times New Roman, Not Bold

Formatted: Font: Times New Roman

Formatted: Font: Times New Roman, Not Bold

Formatted: Font: Times New Roman

Formatted: Font: Times New Roman, Not Bold

Formatted: Font: Times New Roman



- and stable angina pectoris in the Japanese: smoking as a crucial risk factor of acute coronary syndrome. *Journal of cardiology* 2010;55(3):345-53.
10. Sekiyama H, Nagoshi T, Komukai K, et al. Transient decrease in serum potassium level during ischemic attack of acute coronary syndrome: paradoxical contribution of plasma glucose level and glycohemoglobin. *Cardiovascular diabetology* 2013;12:4.
  11. Brinkman GL, Coates EO, Jr. The effect of bronchitis, smoking, and occupation on ventilation. *The American review of respiratory disease* 1963;87:684-93.
  12. Yokode M, Kita T, Arai H, et al. Cholesteryl ester accumulation in macrophages incubated with low density lipoprotein pretreated with cigarette smoke extract. *Proceedings of the National Academy of Sciences of the United States of America* 1988;85(7):2344-8.
  13. Harats D, Ben-Naim M, Dabach Y, et al. Cigarette smoking renders LDL susceptible to peroxidative modification and enhanced metabolism by macrophages. *Atherosclerosis* 1989;79(2-3):245-52.
  14. Gotto AM. Interactions of the major risk factors for coronary heart disease. *The American Journal of Medicine* 1986;80(2):48-55.
  15. Willett WC, Green A, Stampfer MJ, et al. Relative and absolute excess risks of coronary heart disease among women who smoke cigarettes. *The New England journal of medicine* 1987;317(21):1303-9.
  16. Stein Y, Harats D, Stein O. Why is smoking a major risk factor for coronary heart disease in hyperlipidemic subjects? *Annals of the New York Academy of Sciences* 1993;686:66-9; discussion 69-71.
  17. Asano M, Ohkubo C, Hirokawa A, et al. Smoking Research Foundation Annual Research Report, On macro- and microcirculatory effects of tobacco smoke inhalation on atherogenesis in the rabbit. 1987:251-61.
  18. Anderson KM, Wilson PW, Odell PM, et al. An updated coronary risk profile. A statement for health professionals. *Circulation* 1991;83(1):356-62.
  19. Gotto AM, Jr. Interactions of the major risk factors for coronary heart disease. *Am J Med* 1986;80(2a):48-55.
  20. Holbrook JH, Grundy SM, Hennekens CH, et al. Cigarette smoking and cardiovascular diseases. A statement for health professionals by a task force appointed by the steering committee of the American Heart Association. *Circulation* 1984;70(6):1114a-17a.
  21. Caralis DG, Deligonul U, Kern MJ, et al. Smoking is a risk factor for coronary spasm in young women. *Circulation* 1992;85(3):905-9.
  22. Sugiishi M, Takatsu F. Cigarette smoking is a major risk factor for coronary spasm. *Circulation* 1993;87(1):76-9.
  23. Yoshimura M, Yasue H, Nakayama M, et al. A missense Glu298Asp variant in the endothelial nitric oxide synthase gene is associated with coronary spasm in the Japanese. *Human genetics*

Formatted: Font: Times New Roman, Not Bold

Formatted: Font: Times New Roman

Formatted: Font: Times New Roman, Not Bold

Formatted: Font: Times New Roman

Formatted: Font: Times New Roman, Not Bold

Formatted: Font: Times New Roman

Formatted: Font: Times New Roman, Not Bold

Formatted: Font: Times New Roman

Formatted: Font: Times New Roman, Not Bold

Formatted: Font: Times New Roman

Formatted: Font: Times New Roman, Not Bold

Formatted: Font: Times New Roman

Formatted: Font: Times New Roman, Not Bold

Formatted: Font: Times New Roman

Formatted: Font: Times New Roman, Not Bold

Formatted: Font: Times New Roman

Formatted: Font: Times New Roman

Formatted: Font: Times New Roman, Not Bold

Formatted: Font: Times New Roman

Formatted: Font: Times New Roman, Not Bold

Formatted: Font: Times New Roman

Formatted: Font: Times New Roman, Not Bold

Formatted: Font: Times New Roman

Formatted: Font: Times New Roman, Not Bold

Formatted: Font: Times New Roman

Formatted: Font: Times New Roman, Not Bold

Formatted: Font: Times New Roman

1  
2  
3  
4  
5  
6  
7  
8  
9  
10  
11  
12  
13  
14  
15  
16  
17  
18  
19  
20  
21  
22  
23  
24  
25  
26  
27  
28  
29  
30  
31  
32  
33  
34  
35  
36  
37  
38  
39  
40  
41  
42  
43  
44  
45  
46  
47  
48  
49  
50  
51  
52  
53  
54  
55  
56  
57  
58  
59  
60

1998;103(1):65-9.

24. Nakayama M, Yasue H, Yoshimura M, et al. T-786-->C mutation in the 5'-flanking region of the endothelial nitric oxide synthase gene is associated with coronary spasm. *Circulation* 1999;99(22):2864-70.

25. Takaoka K, Yoshimura M, Ogawa H, et al. Comparison of the risk factors for coronary artery spasm with those for organic stenosis in a Japanese population: role of cigarette smoking. *International journal of cardiology* 2000;72(2):121-6.

26. Yasue H, Mizuno Y, Harada E, et al. Effects of a 3-hydroxy-3-methylglutaryl coenzyme A reductase inhibitor, fluvastatin, on coronary spasm after withdrawal of calcium-channel blockers. *Journal of the American College of Cardiology* 2008;51(18):1742-8.

27. Matsuda M, Tamura R, Kanno K, et al. Impact of dyslipidemic components of metabolic syndrome, adiponectin levels, and anti-diabetes medications on malondialdehyde-modified low-density lipoprotein levels in statin-treated diabetes patients with coronary artery disease. *Diabetology & metabolic syndrome* 2013;5(1):77.

**Formatted:** Font: Times New Roman, Not Bold

**Formatted:** Font: Times New Roman

**Formatted:** Font: Times New Roman, Not Bold

**Formatted:** Font: Times New Roman

**Formatted:** Font: Times New Roman, Not Bold

**Formatted:** Font: Times New Roman

**Formatted:** Font: Times New Roman, Not Bold

**Formatted:** Font: Times New Roman

**Formatted:** Font: Times New Roman, Font color: Red

**Formatted:** Font: Times New Roman, Not Bold, Font color: Red

**Formatted:** Font: Times New Roman, Font color: Red

**Formatted:** Font: Not Bold

1  
2  
3  
4  
5  
6  
7  
8 **Figure legends**  
9

10 *Fig. 1 Correlations of MDA-LDL level with various clinical factors*

11  
12 The clinical factors affecting MDA-LDL level are shown in (A)-(H).  
13  
14

15  
16  
17  
18 *Fig. 2 Correlation of smoking status with MDA-LDL and LDL-cholesterol levels*

19  
20 Correlation between MDA-LDL level and Brinkman index (A) and, between LDL-C level and  
21  
22 Brinkman index (B) was determined with a linear regression analysis.  
23

24  
25 Kruskal Wallis test was performed to evaluate the difference of MDA-LDL (C) and LDL-C (D)  
26 among 4 groups divided by Brinkman index. Comparison of MDA-LDL levels among  
27 non-smokers, ex-smokers and current smokers (E). Comparison of MDA-LDL levels in each  
28 patient group among non-smokers and ex-smokers who had quit more than 21 years earlier,  
29 ex-smokers who had quit 11 to 20 years ago, ex-smokers who had quit less than 10 years ago  
30 and current smokers (F).  
31  
32

33  
34 ~~Comparison of MDA-LDL levels among non-smokers, ex-smokers and current smokers (C).~~  
35  
36 ~~Comparison of MDA-LDL levels in each patient group among non-smokers and ex-smokers~~  
37 ~~who had quit more than 21 years earlier, ex-smokers who had quit 11 to 20 years ago,~~  
38 ~~ex-smokers who had quit less than 10 years ago and current smokers (D).~~  
39  
40  
41  
42  
43  
44  
45  
46  
47  
48  
49

50  
51  
52  
53  
54 *Fig. 3 Effects of the statin therapy on the correlations of smoking status with MDA-LDL or*

1  
2  
3  
4  
5  
6  
7  
8  
9 *LDL-cholesterol level*

10  
11 The correlations of the smoking status with MDA-LDL and LDL-C levels were investigated  
12  
13  
14 after dividing the patients into two groups; with (A) or without (B) statin treatment.  
15  
16  
17  
18  
19  
20  
21  
22  
23  
24  
25  
26  
27  
28  
29  
30  
31  
32  
33  
34  
35  
36  
37  
38  
39  
40  
41

42 **Table 2**  
43 **Multipl**  
44 **e**  
45 **Regress**  
46 **ion**  
47 **Analysi**  
48 **s**  
49  
50  
51  
52  
53  
54

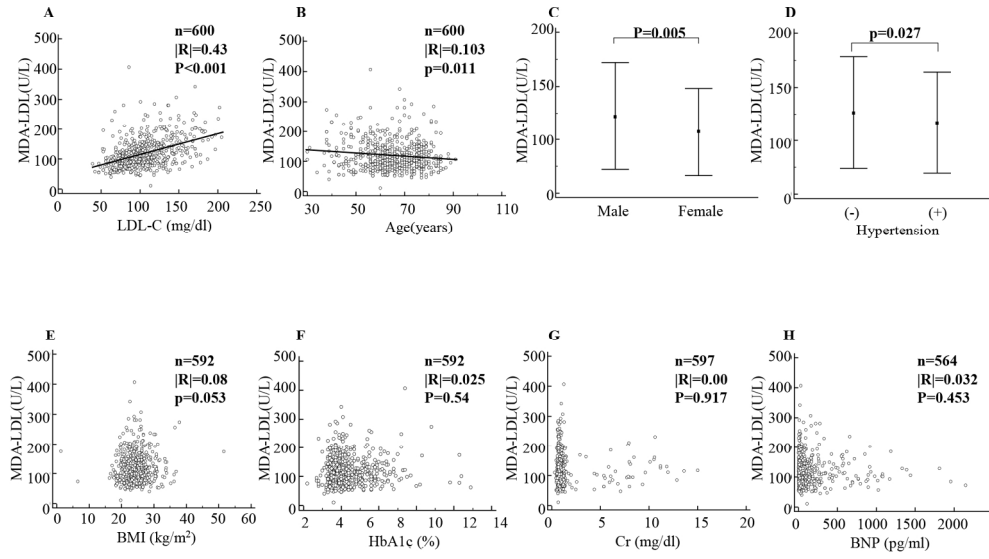

Figure 1

173x130mm (300 x 300 DPI)

Review only

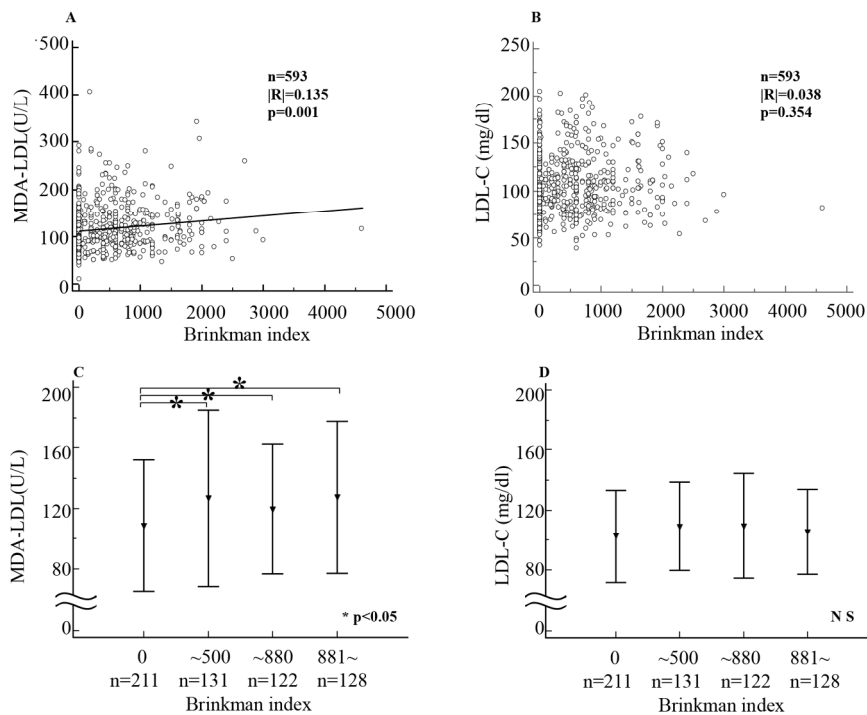

Figure 2-1

173x130mm (300 x 300 DPI)

1  
2  
3  
4  
5  
6  
7  
8  
9  
10  
11  
12  
13  
14  
15  
16  
17  
18  
19  
20  
21  
22  
23  
24  
25  
26  
27  
28  
29  
30  
31  
32  
33  
34  
35  
36  
37  
38  
39  
40  
41  
42  
43  
44  
45  
46  
47  
48  
49  
50  
51  
52  
53  
54  
55  
56  
57  
58  
59  
60

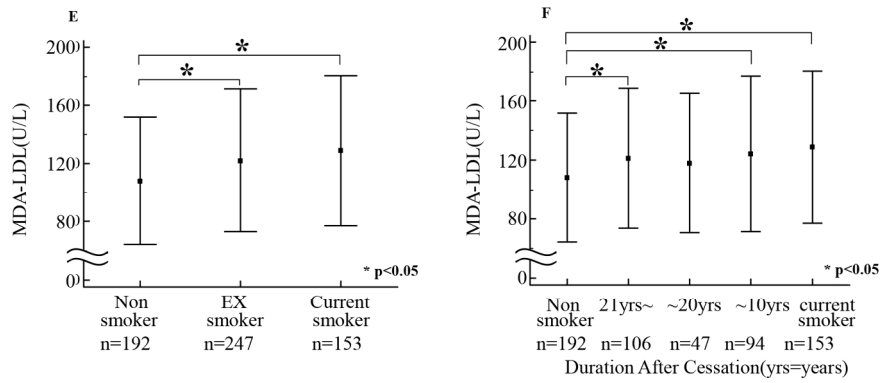

Figure 2-2

173x130mm (300 x 300 DPI)

View only

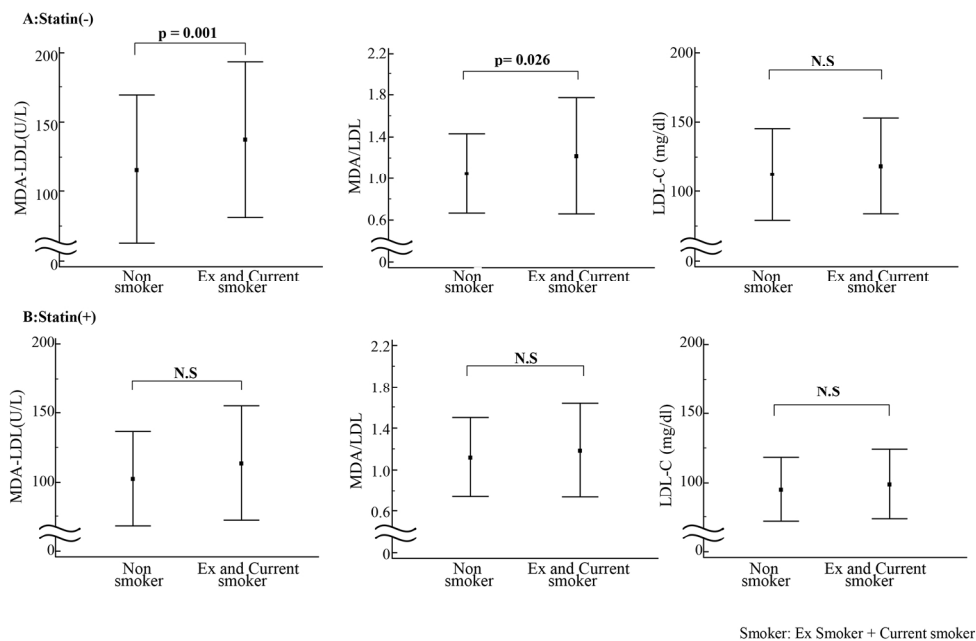

Figure 3

173x130mm (300 x 300 DPI)
